# Supplementary material for: You are what your fungus eats: Diet shapes the microbial garden of a fungus-growing ant
Source: Research Square preprint supplement (doi:10.21203/rs.3.rs-6521639/v1), 2025-04-25
Supplement: Supplementary file 1 [file e1b4babfad76295487d7a41c.pdf]

## You are what your fungus eats: Diet shapes the microbial garden of a fungus-growing ant

Mariana de Oliveira Barcoto; Raquel Lima de Sousa; João Gabriel da Silva Soares; Rodrigo Henrique dos Santos Garcia; Eduardo Ribeiro de Azevedo; Lucas William Mendes; Odair Correa Bueno; Andre Rodrigues

### Supplementary Data

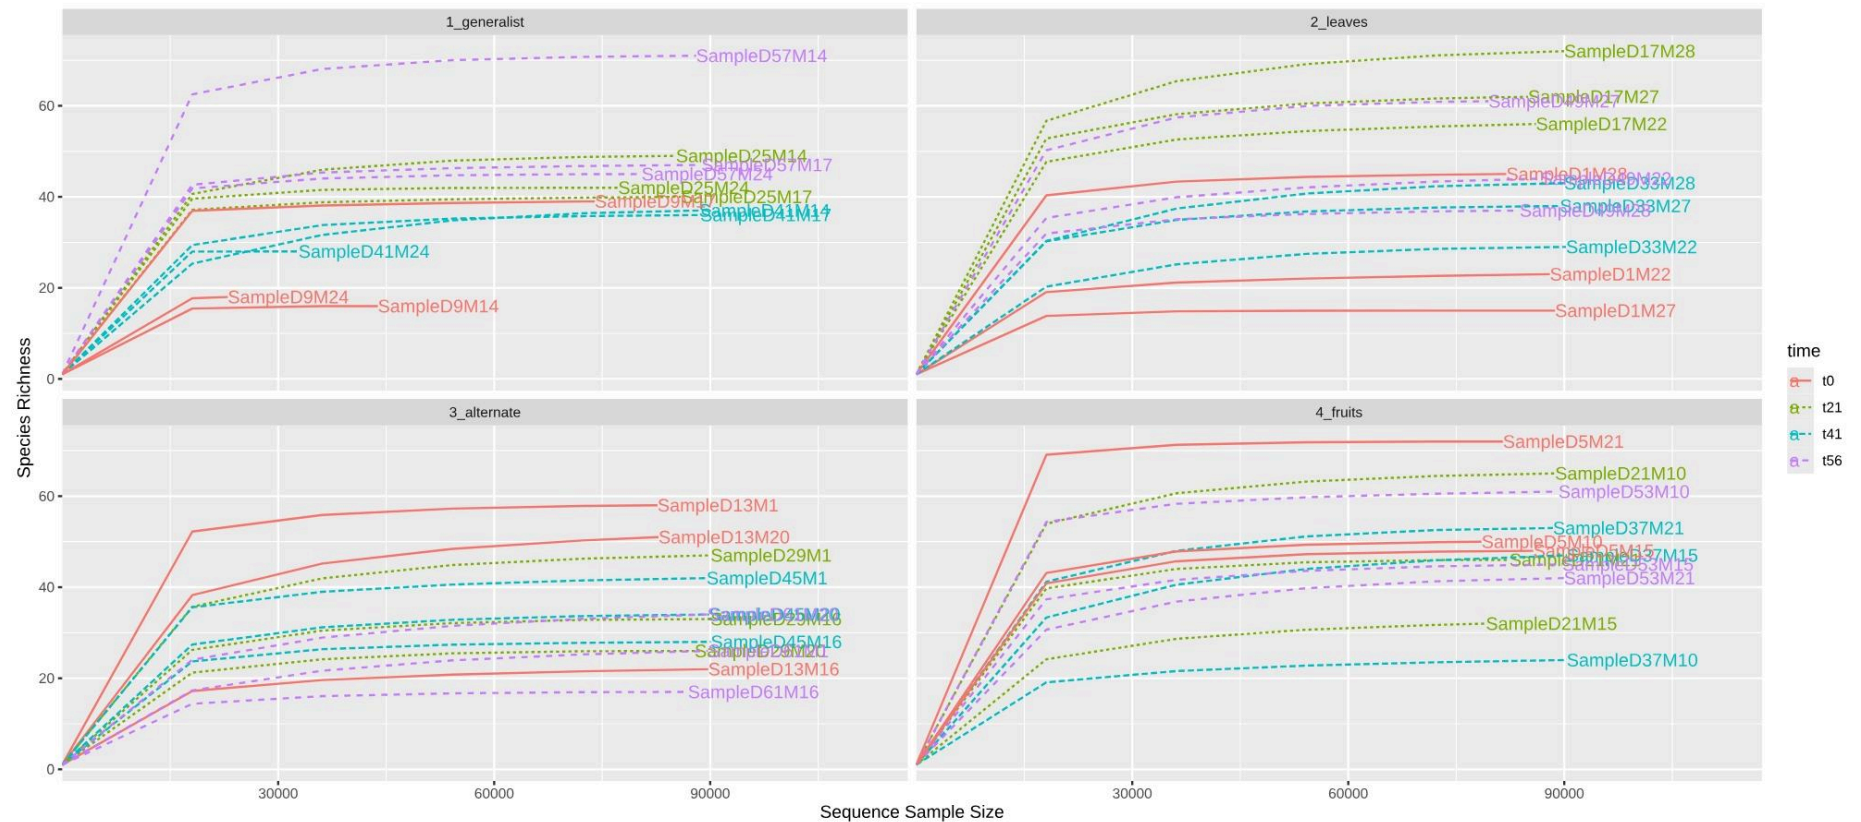

**Fig. S1:** Rarefaction curves of 16S rRNA sequences, from young garden regions of different diets, colored by time point time.

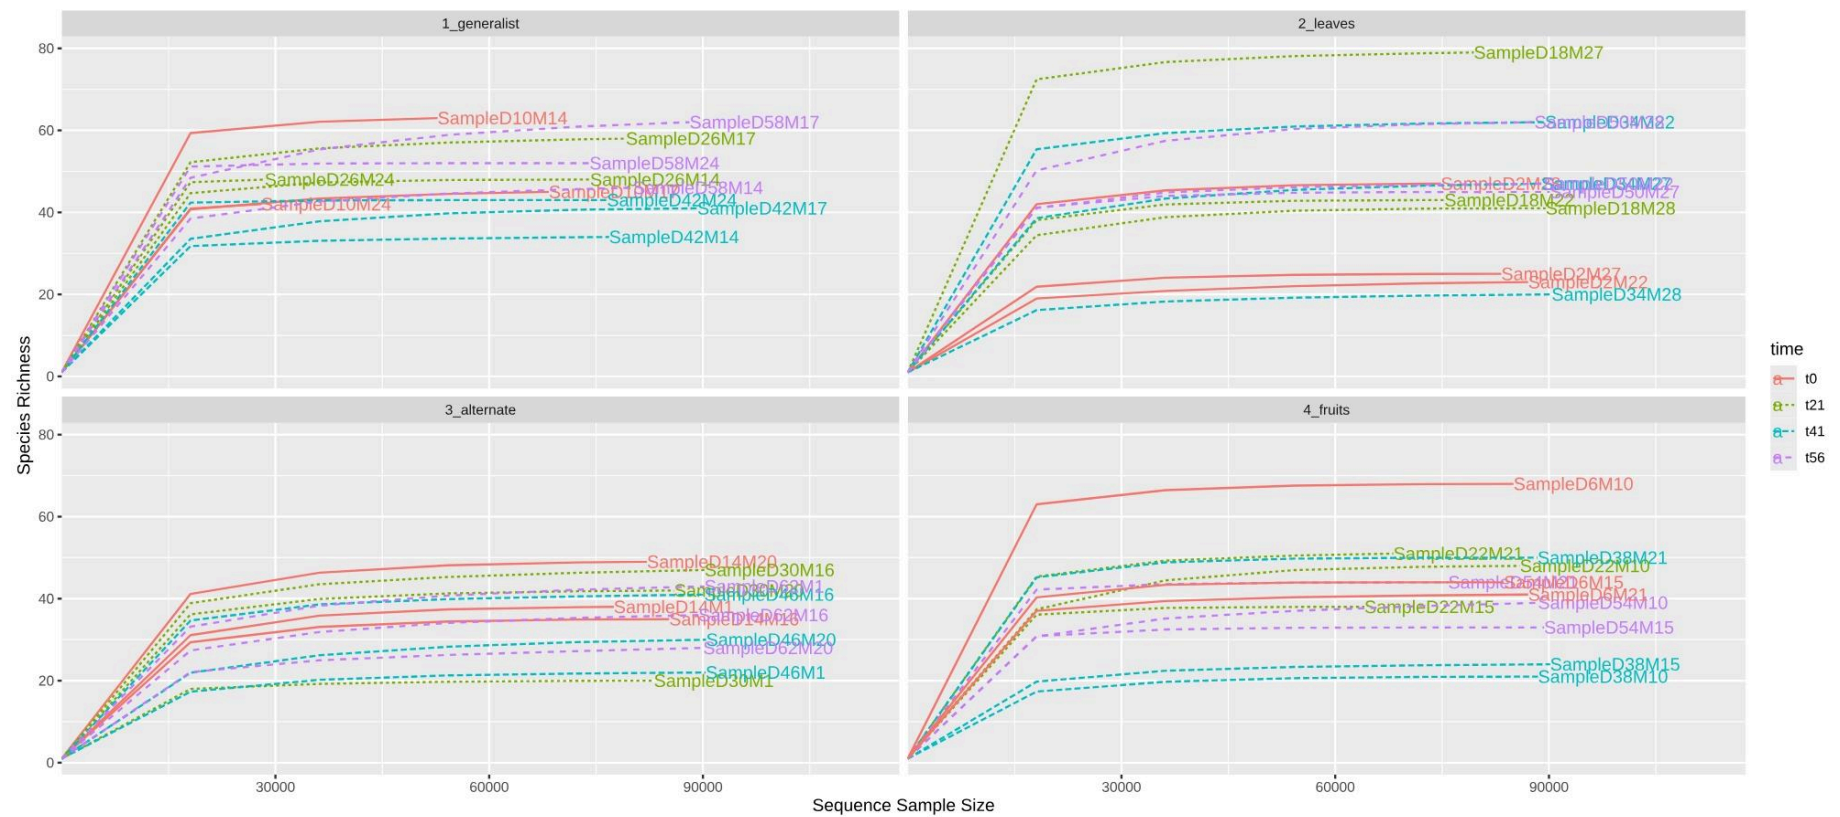

**Fig. S2:** Rarefaction curves of 16S rRNA sequences, from central regions of different diets, colored by time point time.

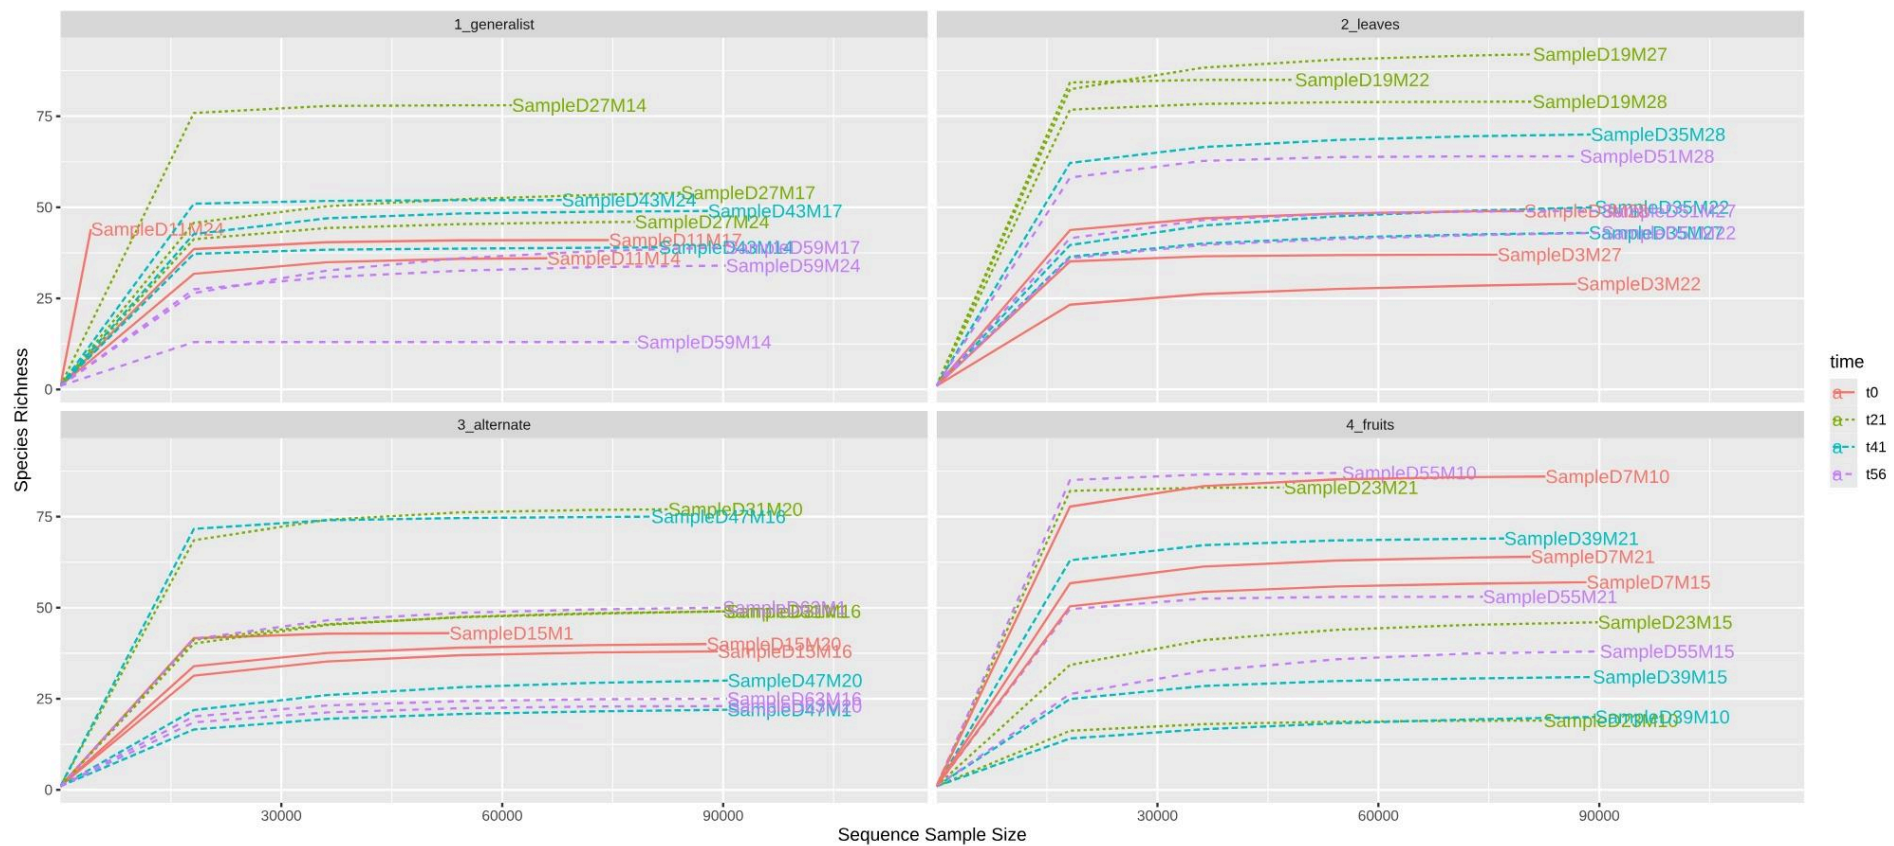

**Fig. S3:** Rarefaction curves of 16S rRNA sequences, from old regions of different diets, colored by time point time.

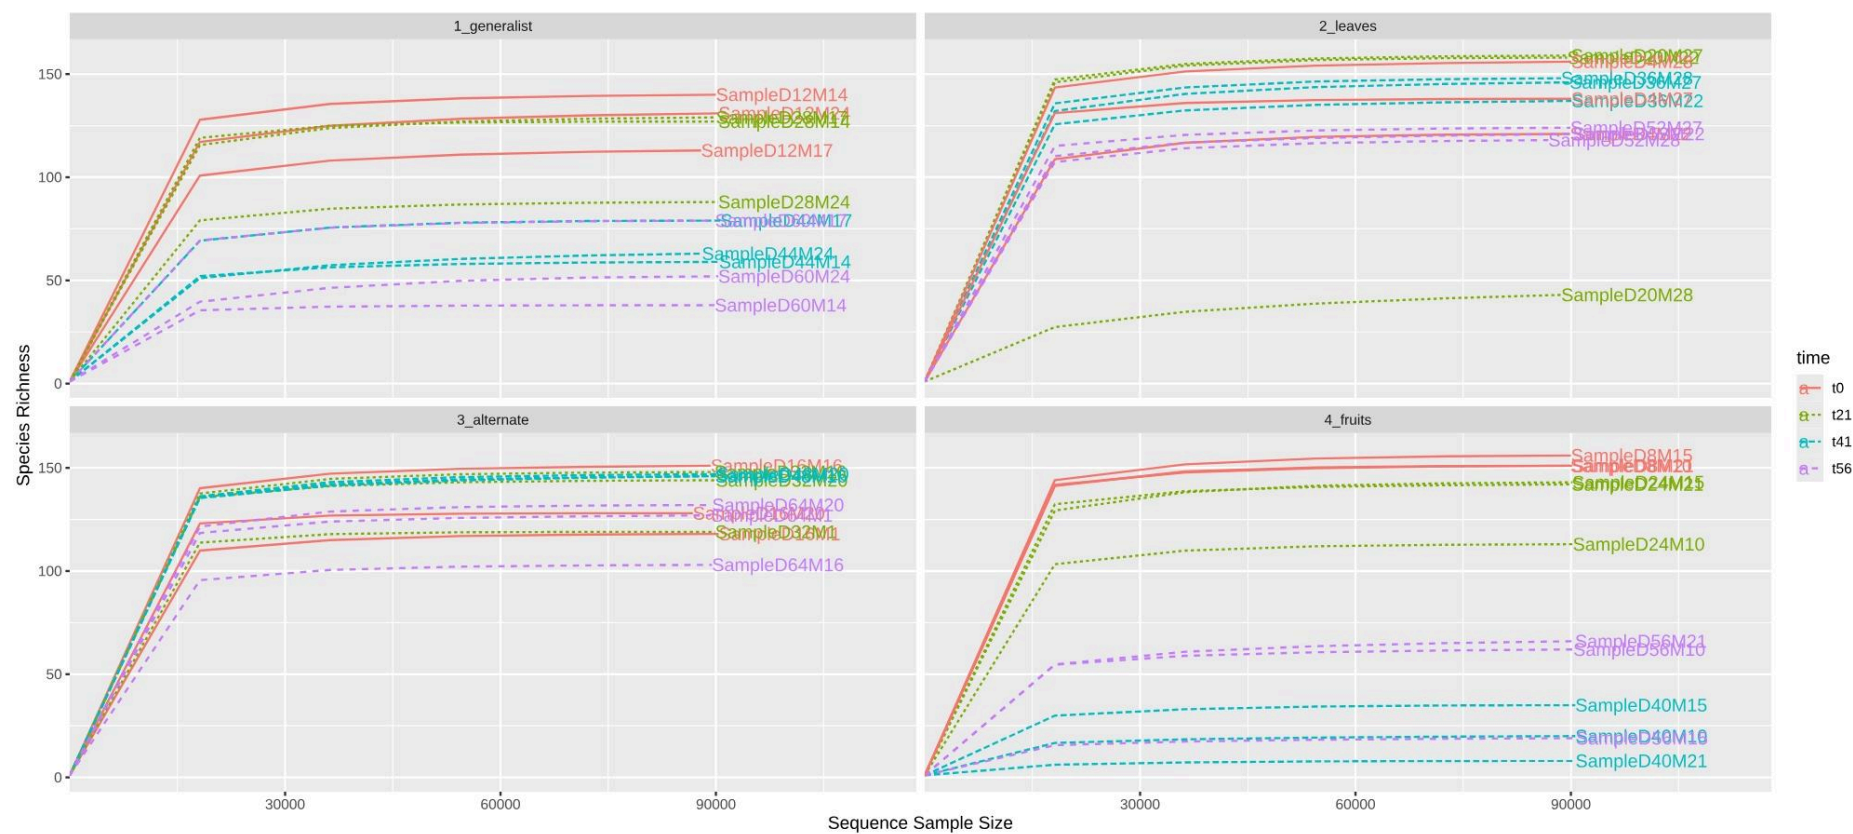

**Fig. S4:** Rarefaction curves of 16S rRNA sequences, from waste samples of different diets, colored by time point time.



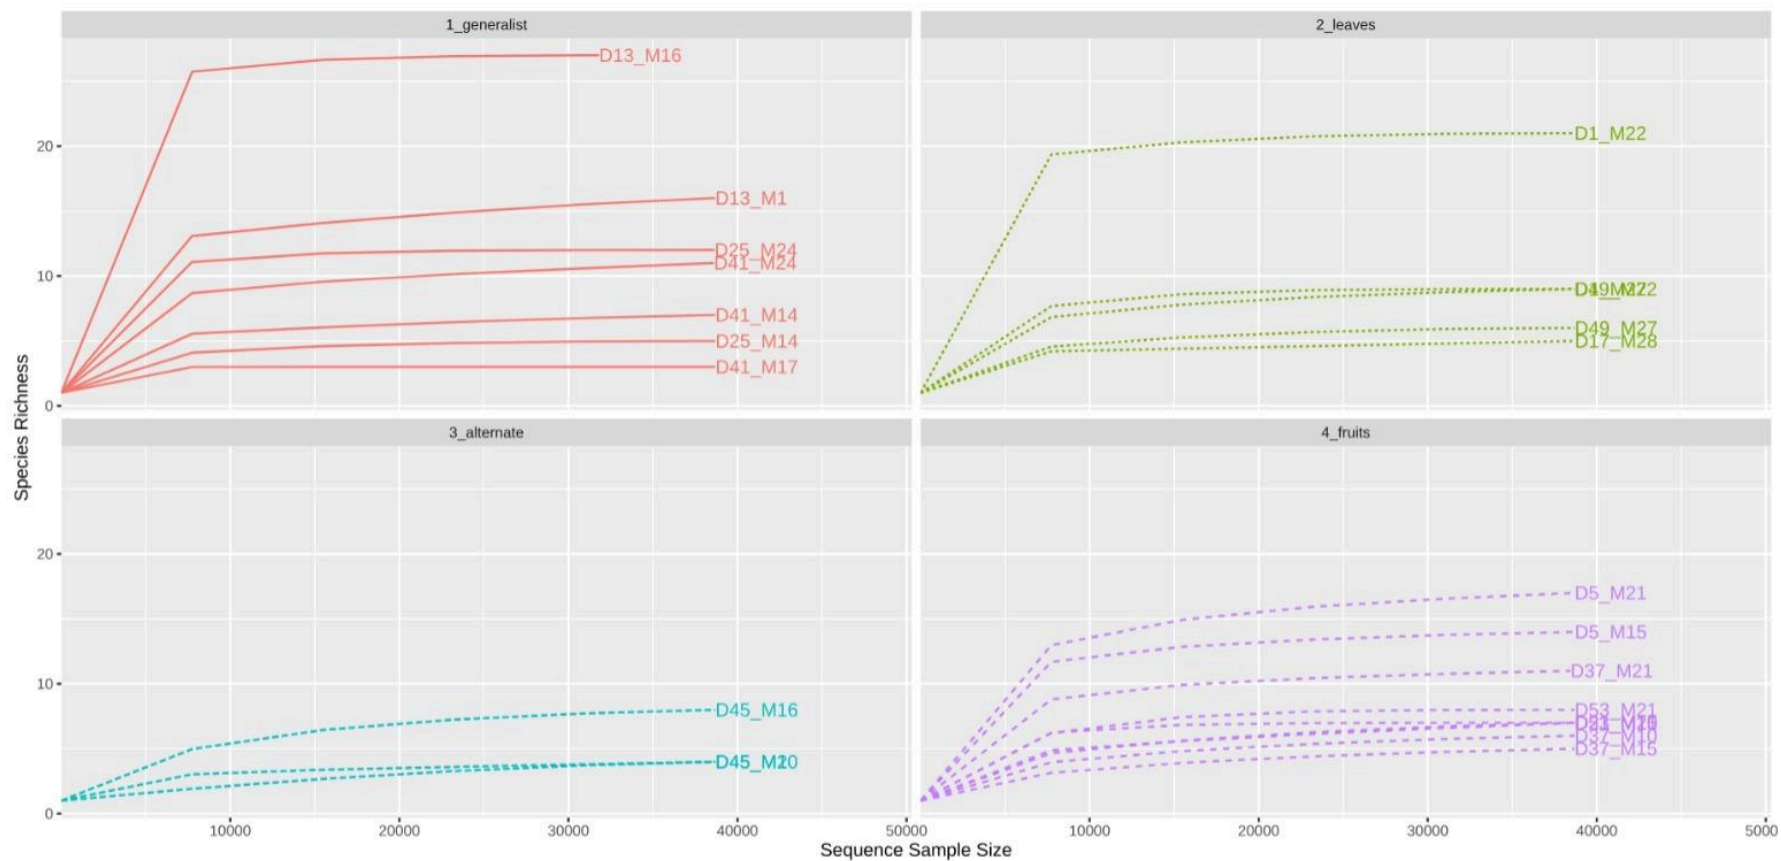

**Fig. S5:** Rarefaction curves of ITS sequences, from young regions of different diets; samples of all time points are gathered.

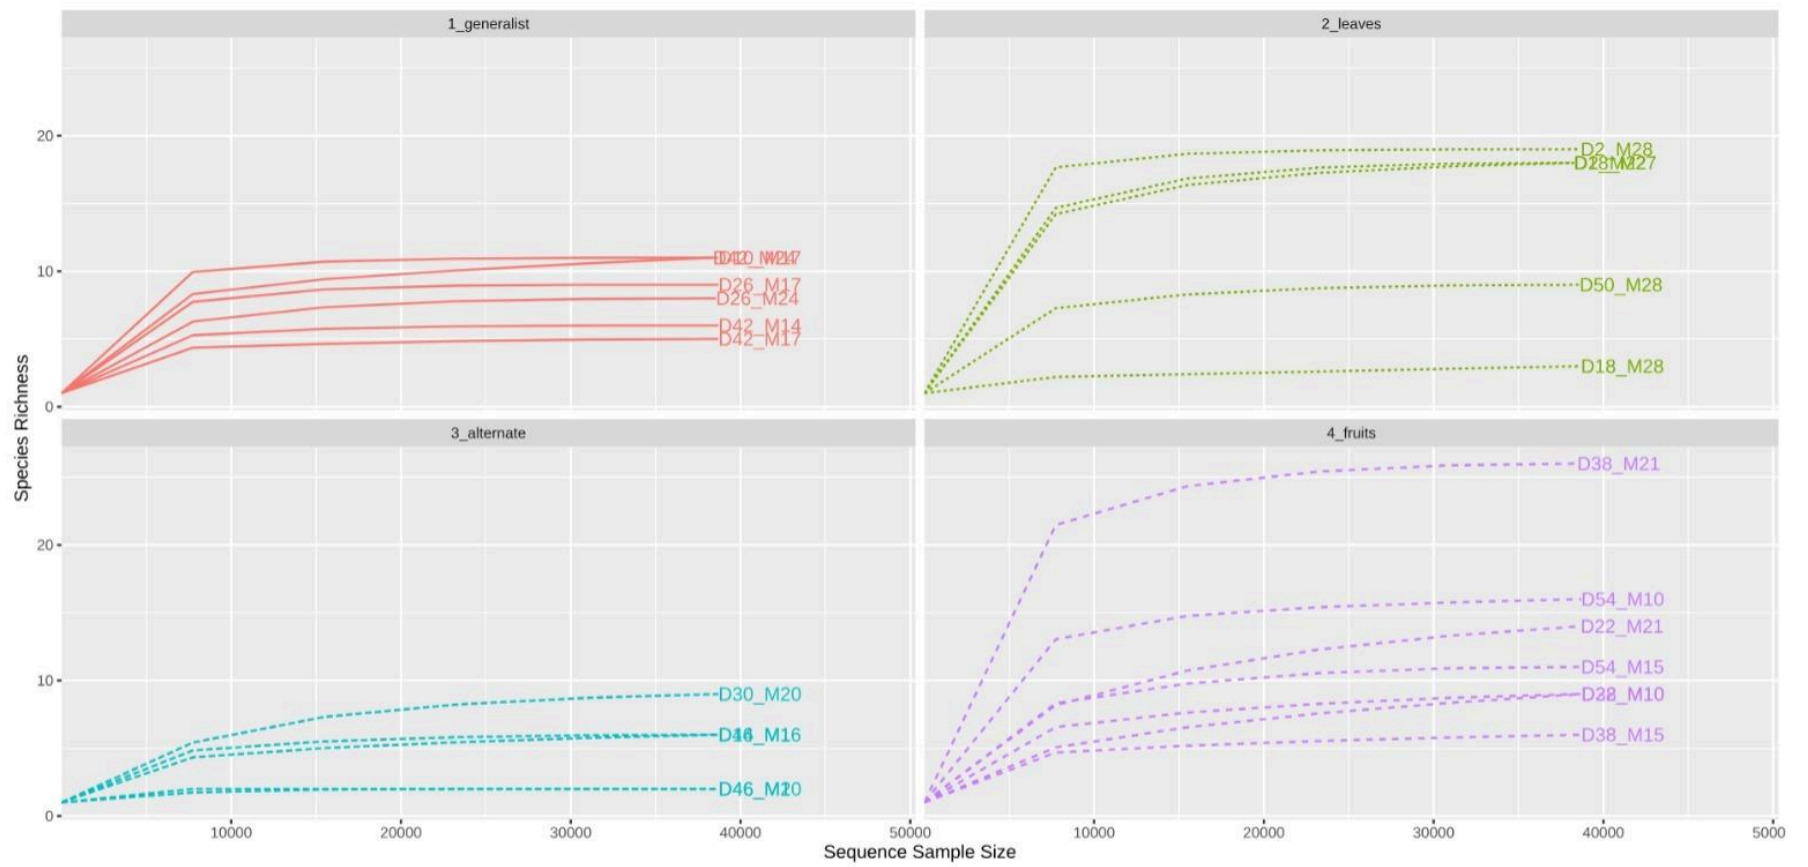

**Fig. S6:** Rarefaction curves of ITS sequences, from central regions of different diets; samples of all time points are gathered.

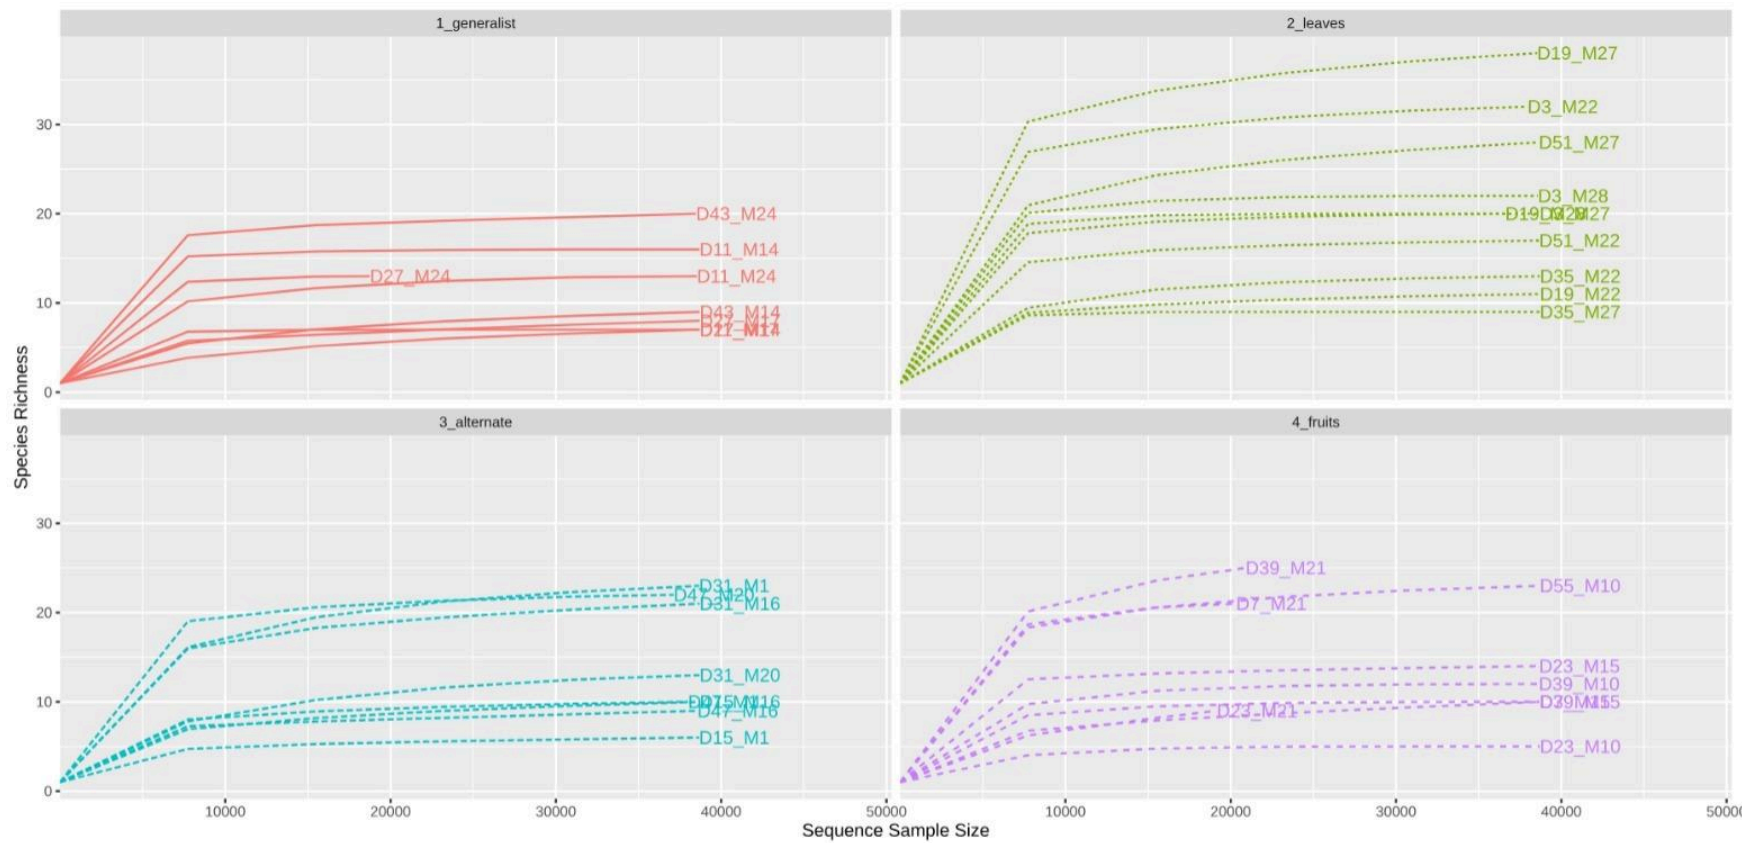

**Fig. S7:** Rarefaction curves of ITS sequences, from old regions of different diets; samples of all time points are gathered.

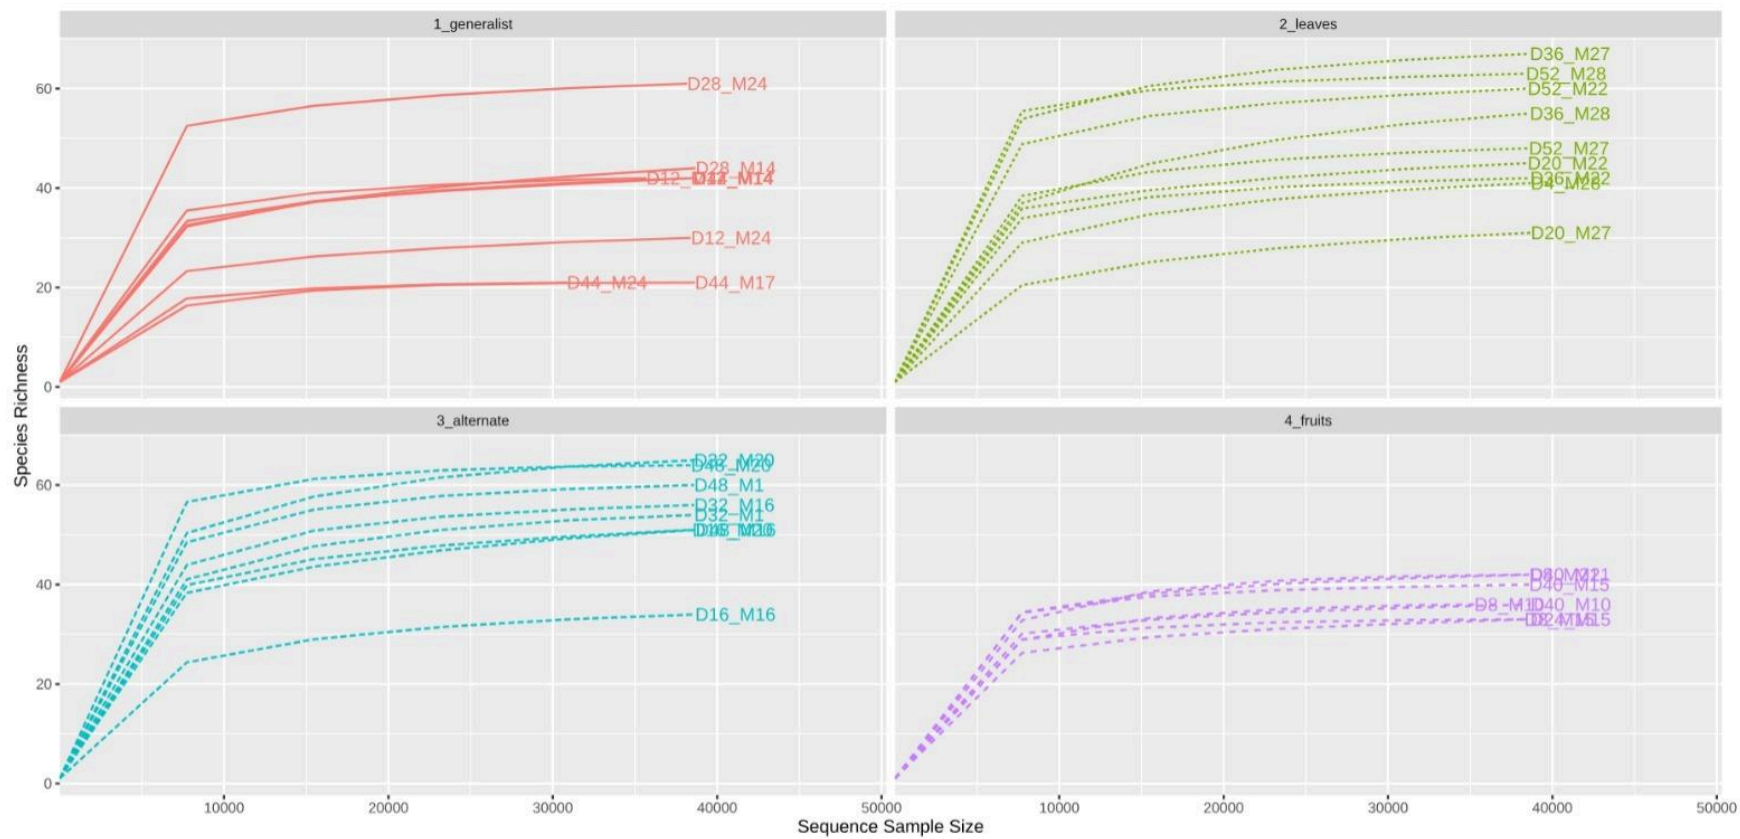

**Fig. S8:** Rarefaction curves of ITS sequences, from waste samples of different diets; samples of all time points are gathered.



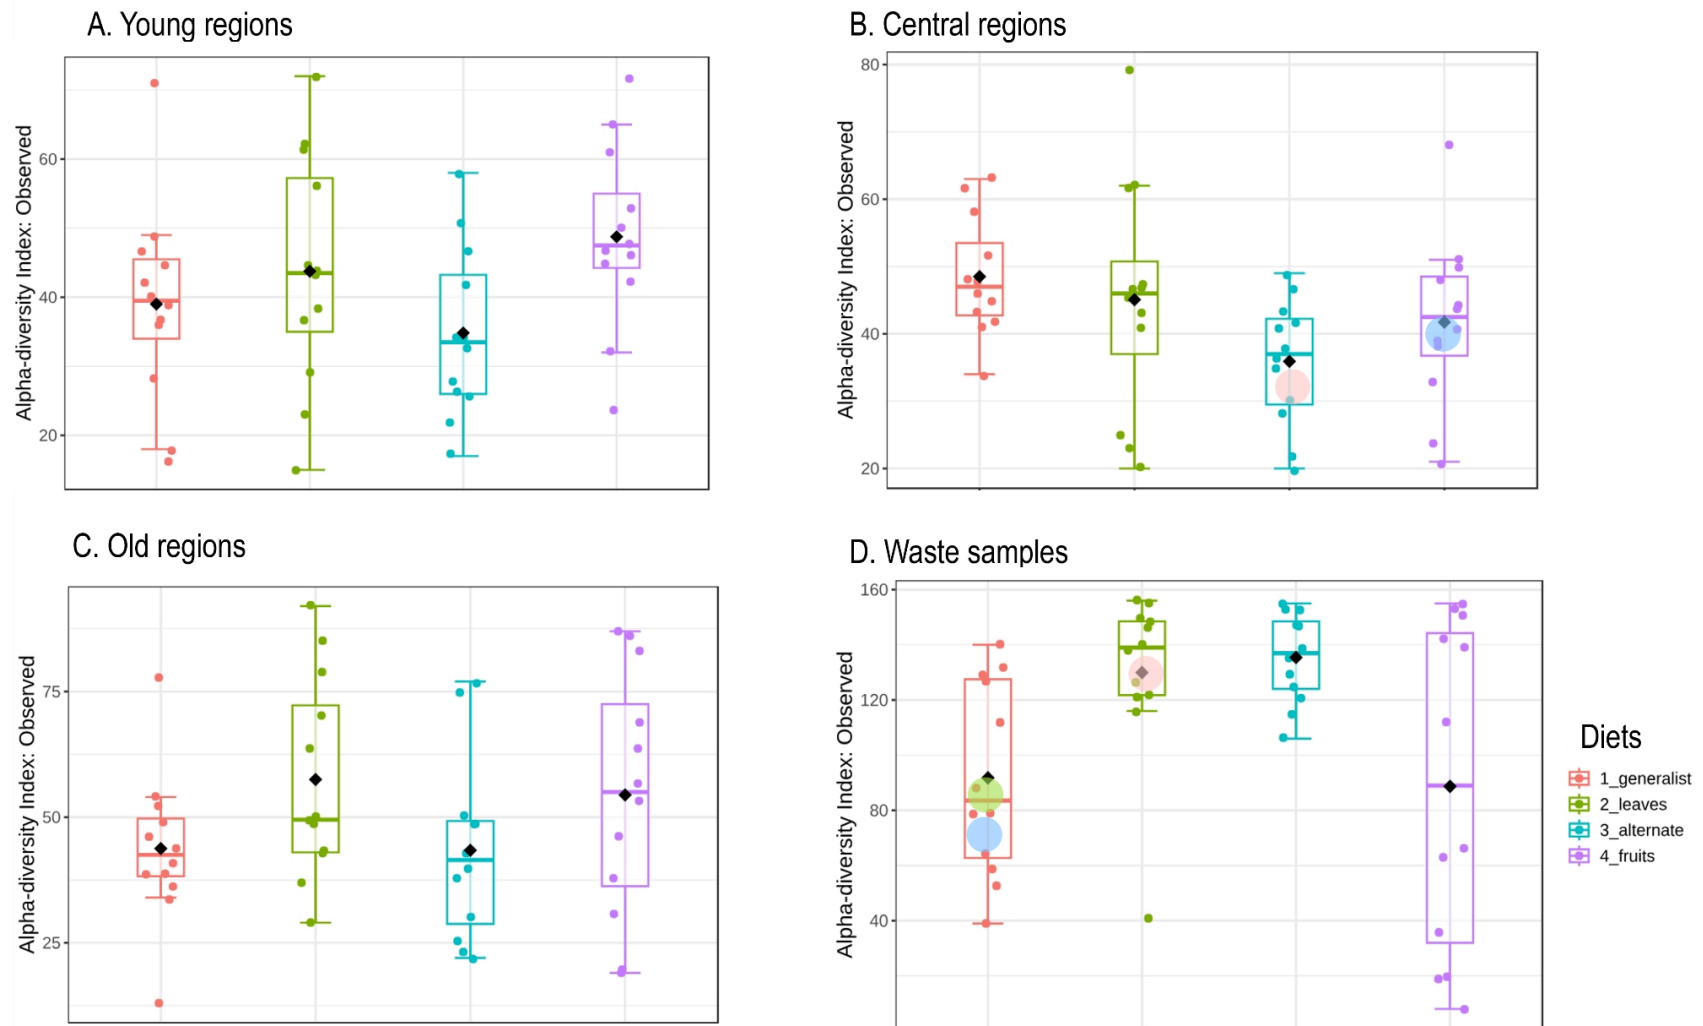

**Fig. S9:** Bacterial alpha-diversity at genus level, based on Observed Features (Richness), estimated by Mann-Whitney/Kruskal-Wallis. Significant differences between diets (Wilcoxon test, FDR-adjusted  $p < 0.05$ ) were coloured according to the group(s) they differed from.

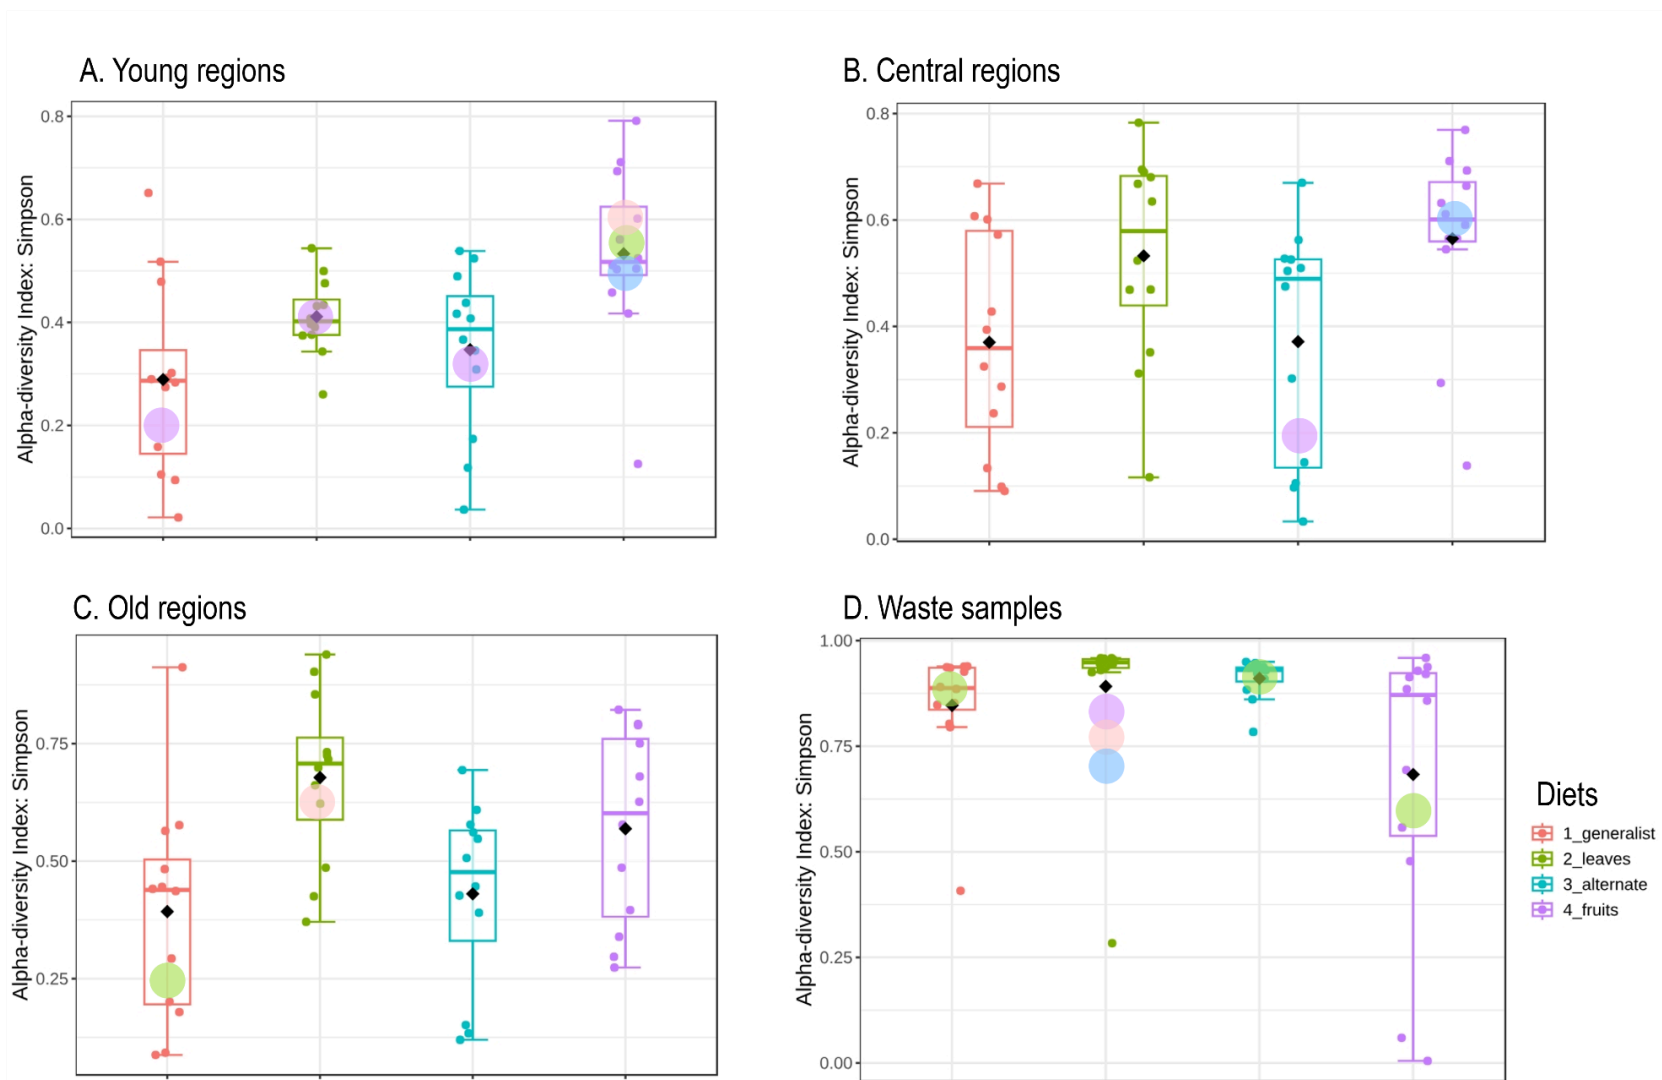

**Fig. S10:** Bacterial alpha-diversity at genus level, based on the Simpson Index, estimated by Mann-Whitney/Kruskal-Wallis. Significant differences between diets (Wilcoxon test, FDR-adjusted  $p < 0.05$ ) were coloured according to the group(s) they differed from.

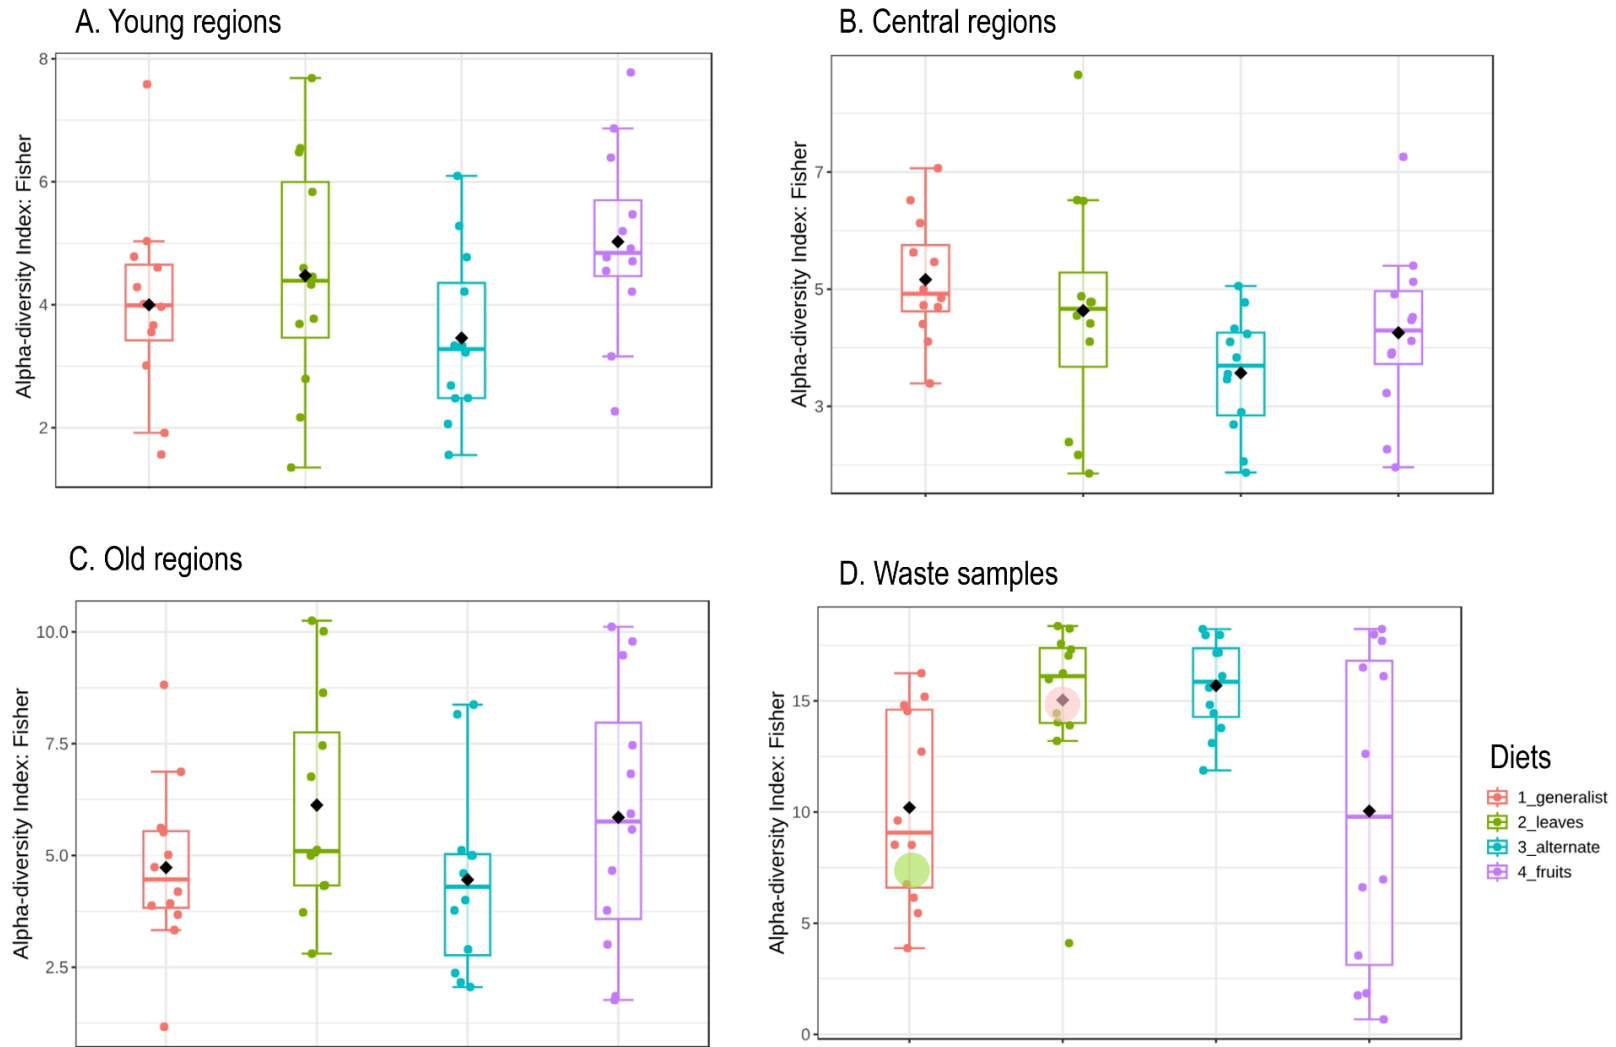

**Fig. S11:** Bacterial alpha-diversity at genus level, based on the Fisher Index, estimated by Mann-Whitney/Kruskal-Wallis. Significant differences between diets (Wilcoxon test, FDR-adjusted  $p < 0.05$ ) were coloured according to the group(s) they differed from.

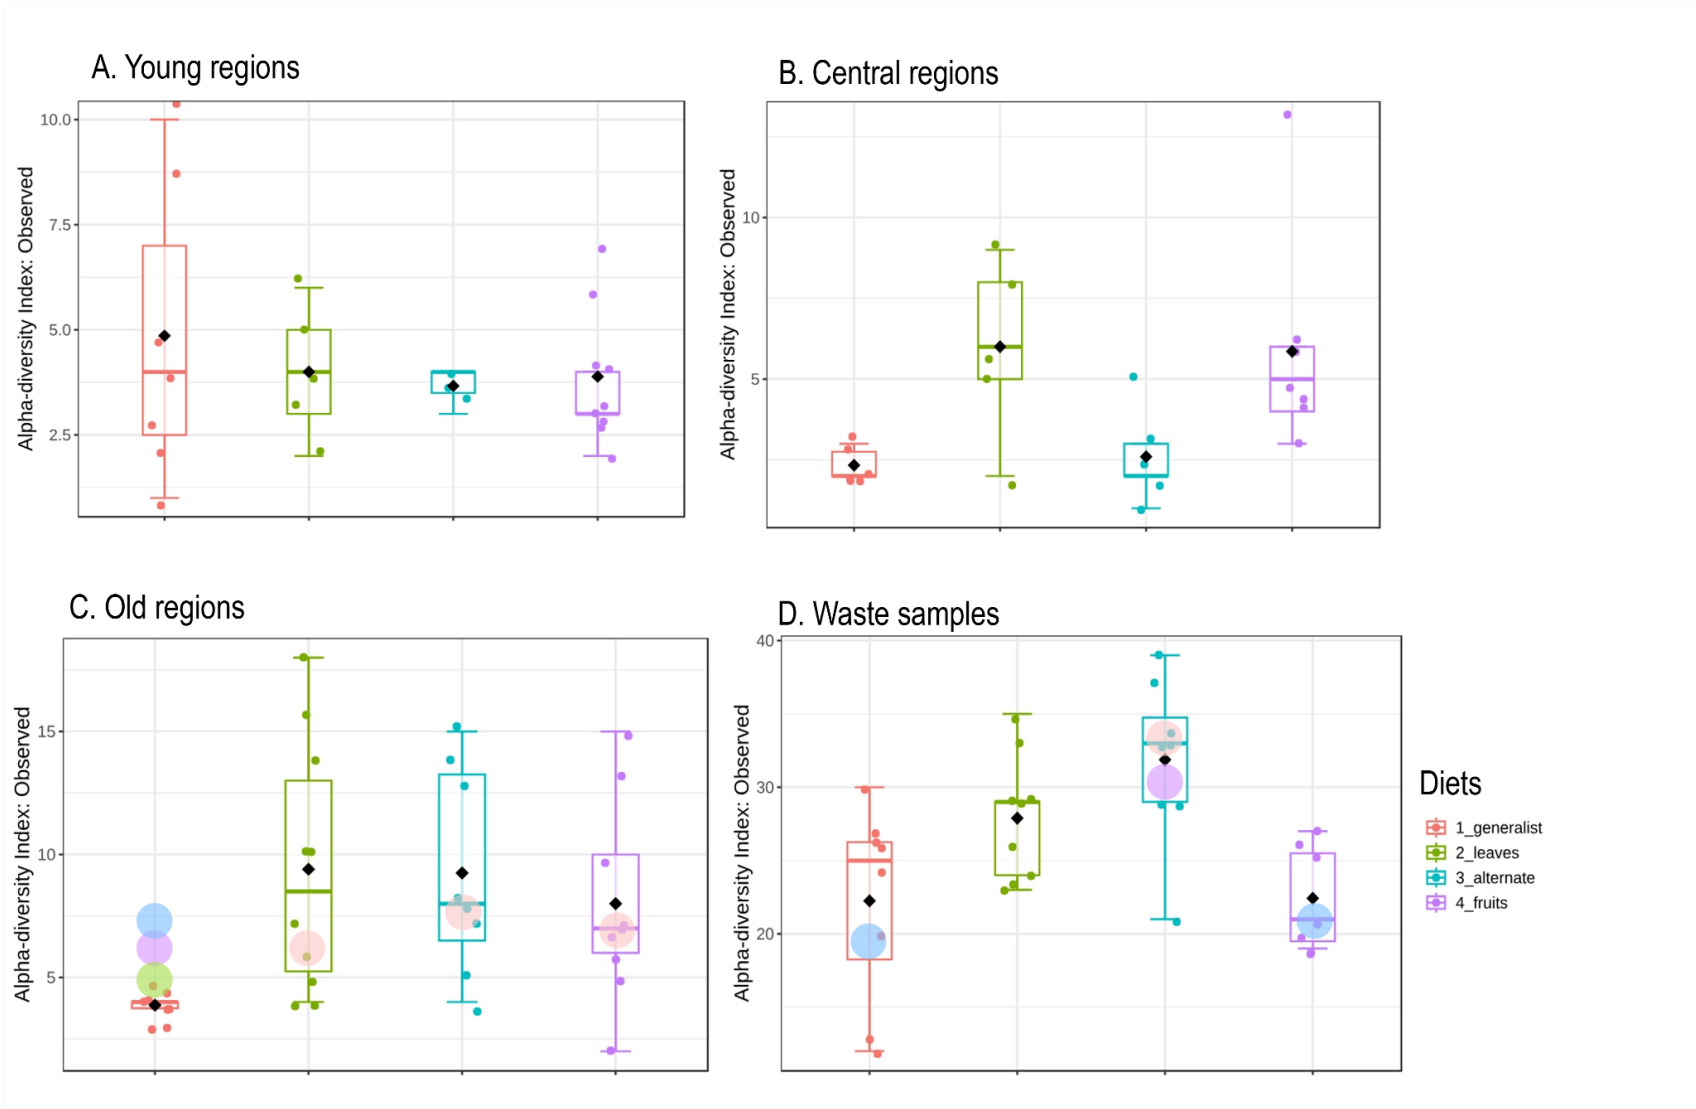

**Fig. S12:** Fungal alpha-diversity at genus level, based on Observed Features (Richness), estimated by Mann-Whitney/Kruskal-Wallis. Significant differences between diets (Wilcoxon test, FDR-adjusted  $p < 0.05$ ) were coloured according to the group(s) they differed from.

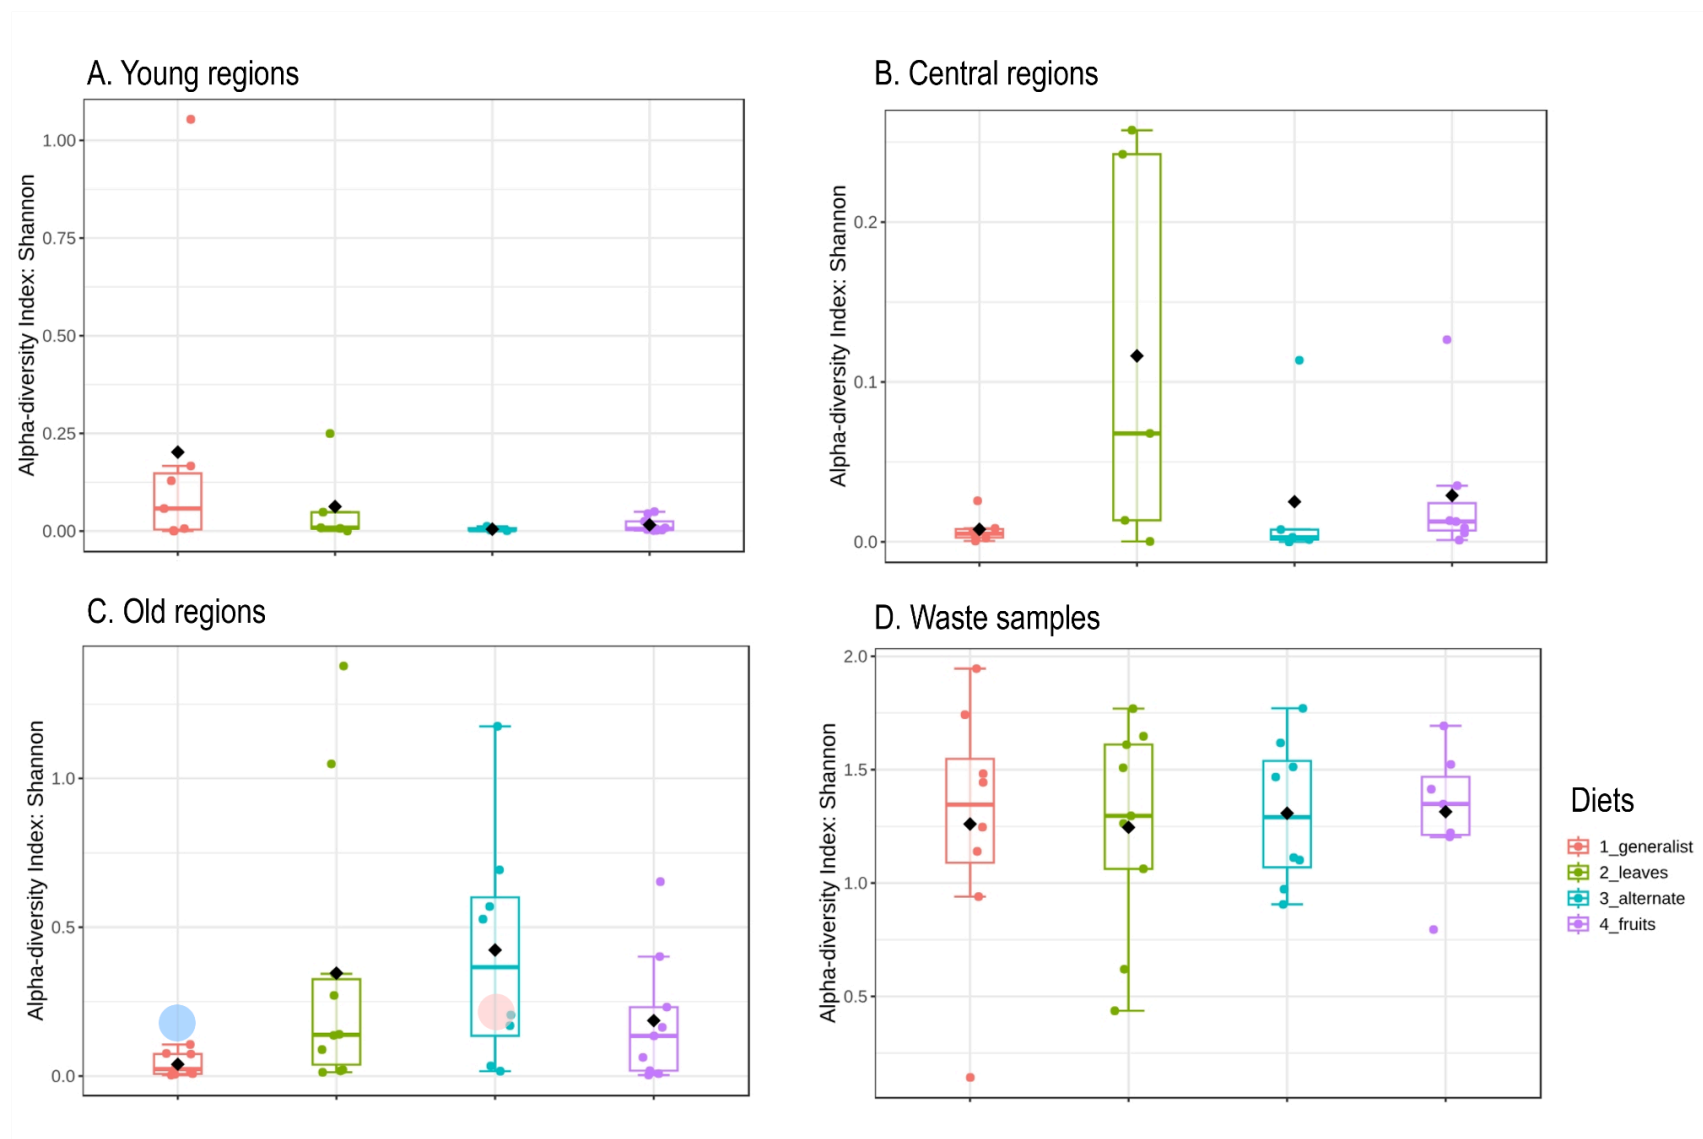

**Fig. S13:** Fungal alpha-diversity at genus level, based on the Shannon Index, estimated by Mann-Whitney/Kruskal-Wallis. Significant differences between diets (Wilcoxon test, FDR-adjusted  $p < 0.05$ ) were coloured according to the group(s) they differed from.



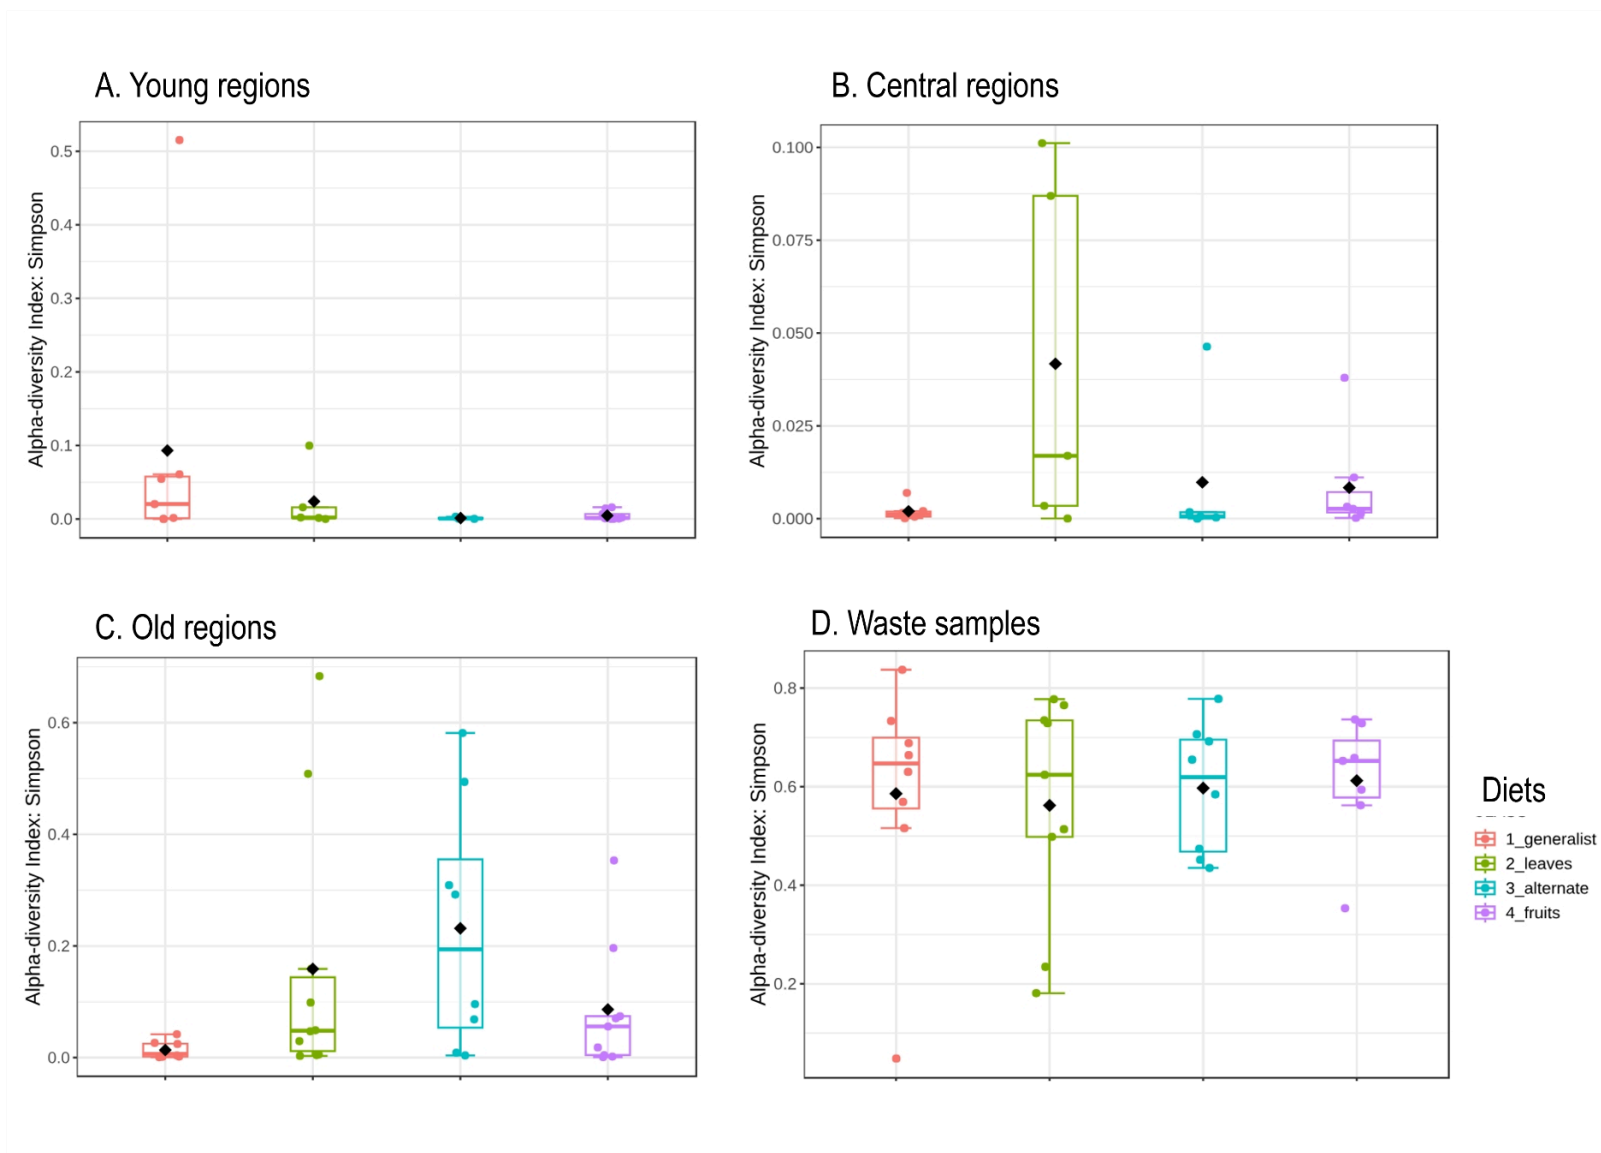

**Fig. S14:** Fungal alpha-diversity at genus level, based on the Simpson Index, estimated by Mann-Whitney/Kruskal-Wallis.

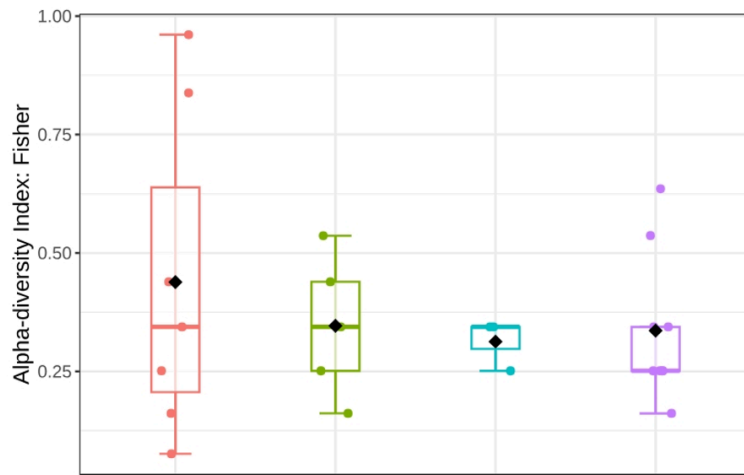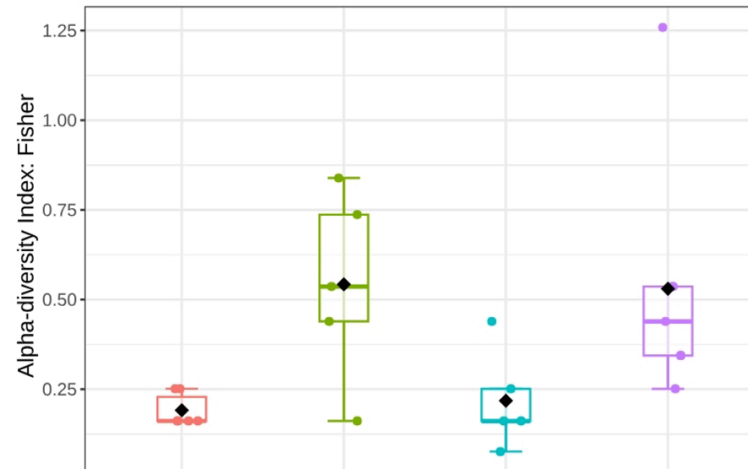

C. Old regions

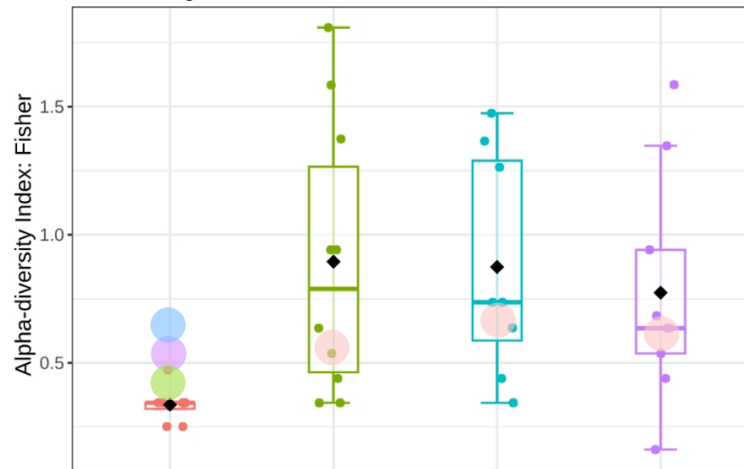

D. Waste samples

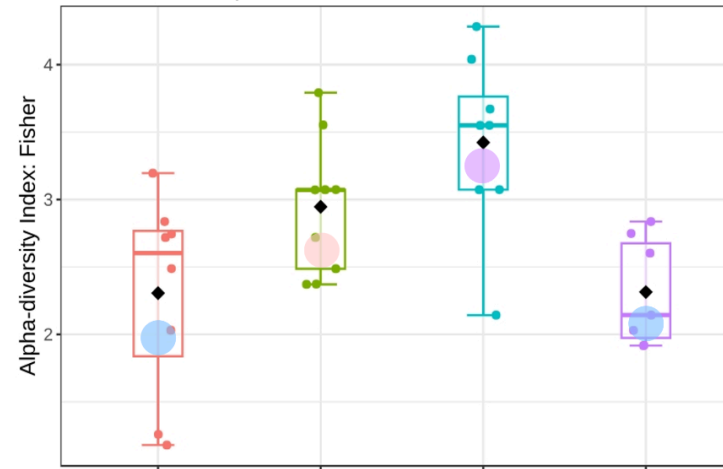

Diets

- 1\_generalist
- 2\_leaves
- 3\_alternate
- 4\_fruits

**Fig. S15:** Fungal alpha-diversity at genus level, based on the Fisher Index, estimated by Mann-Whitney/Kruskal-Wallis. Significant differences between diets (Wilcoxon test, FDR-adjusted  $p < 0.05$ ) were coloured according to the group(s) they differed from.

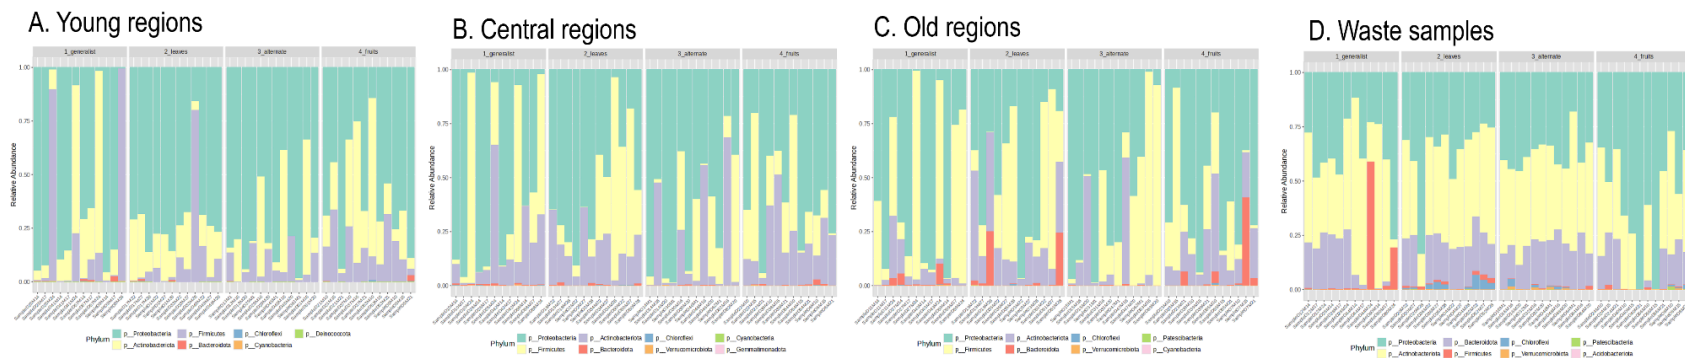

**Fig. S16:** Relative abundance of bacterial phylum shown across garden regions for the different diets.

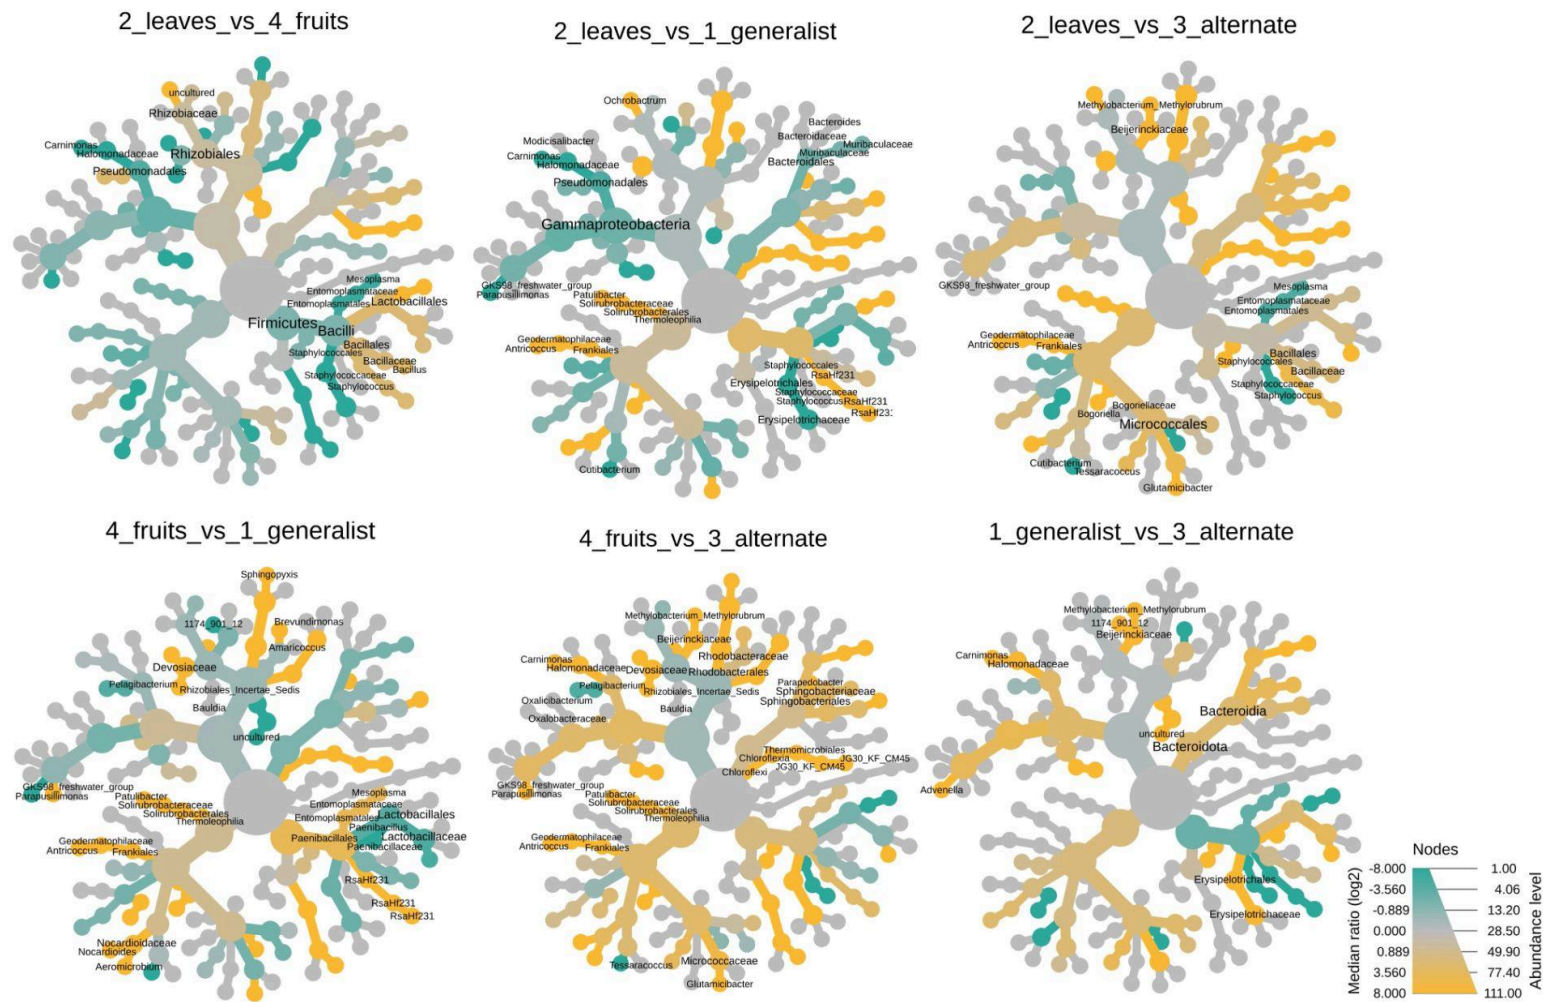

**Fig. S17:** Bacterial genus-level heat tree, comparing the relative abundance between diets in young gardens.





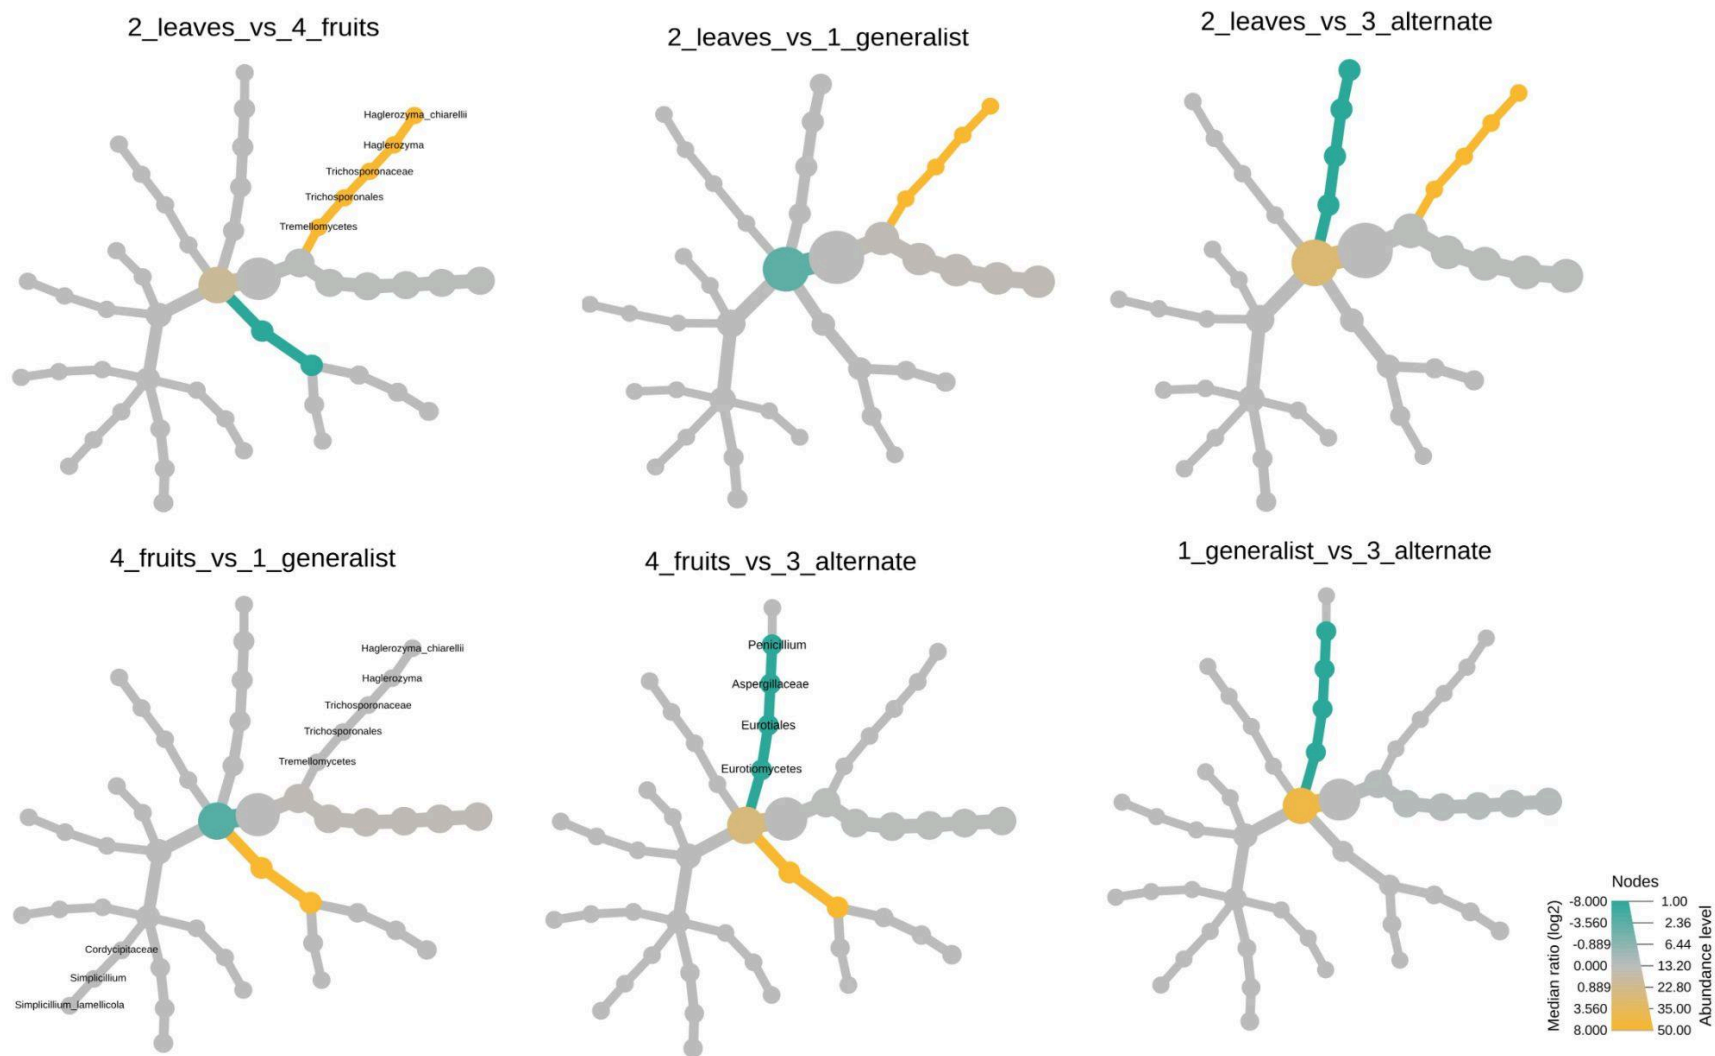

**Fig. S19:** Fungal genus-level heat tree, comparing the relative abundance between diets in young gardens.

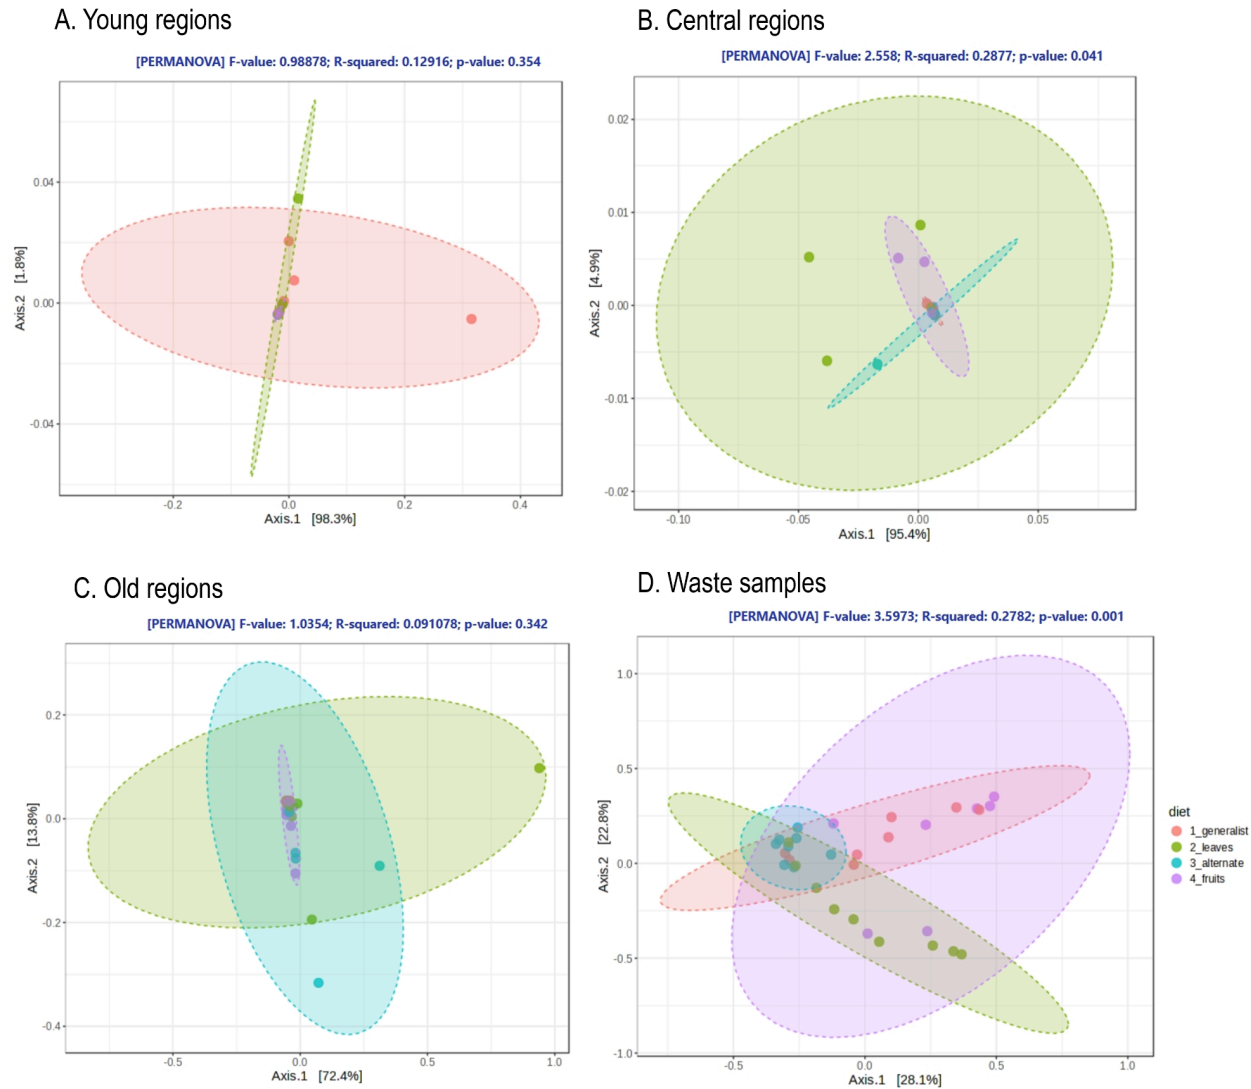

**Fig. S20:** Beta-Diversity estimated with Principal Coordinates Analysis (PCoA) ordination, based on Bray-Curtis distances; statistical significance of data distribution and pairwise comparisons were defined by PERMANOVA.

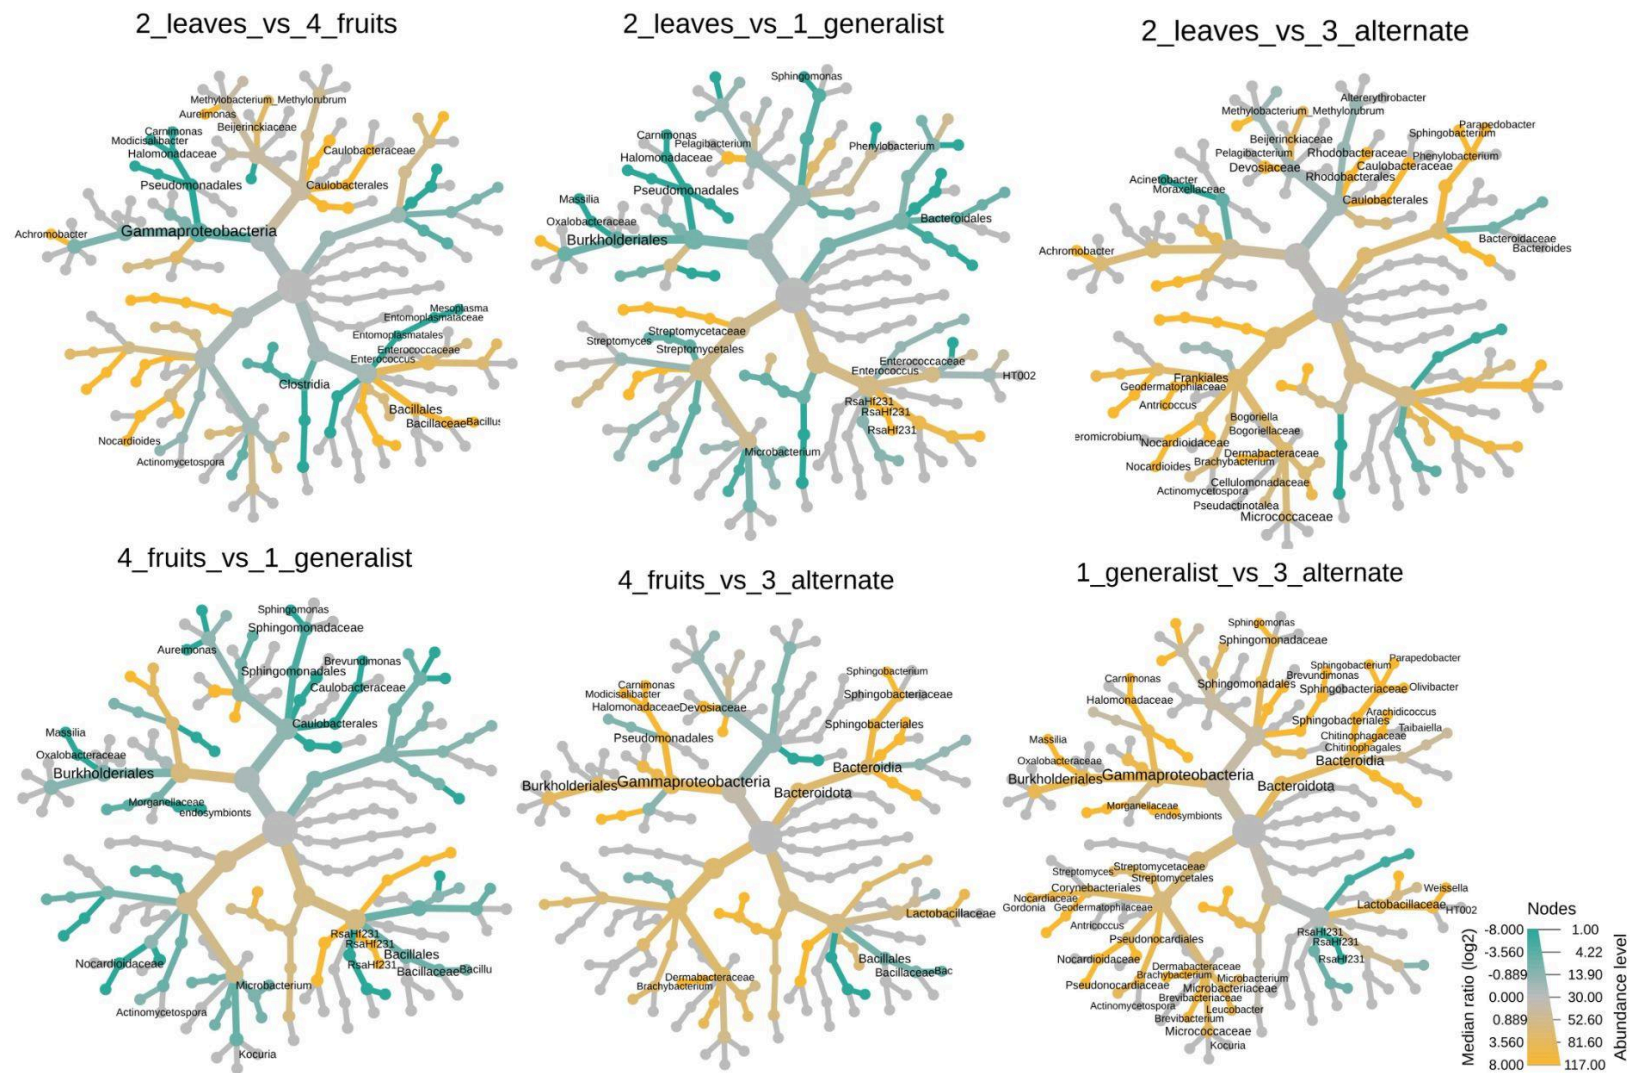

**Fig. S21:** Bacterial genus-level heat tree, comparing the relative abundance between diets in central gardens.

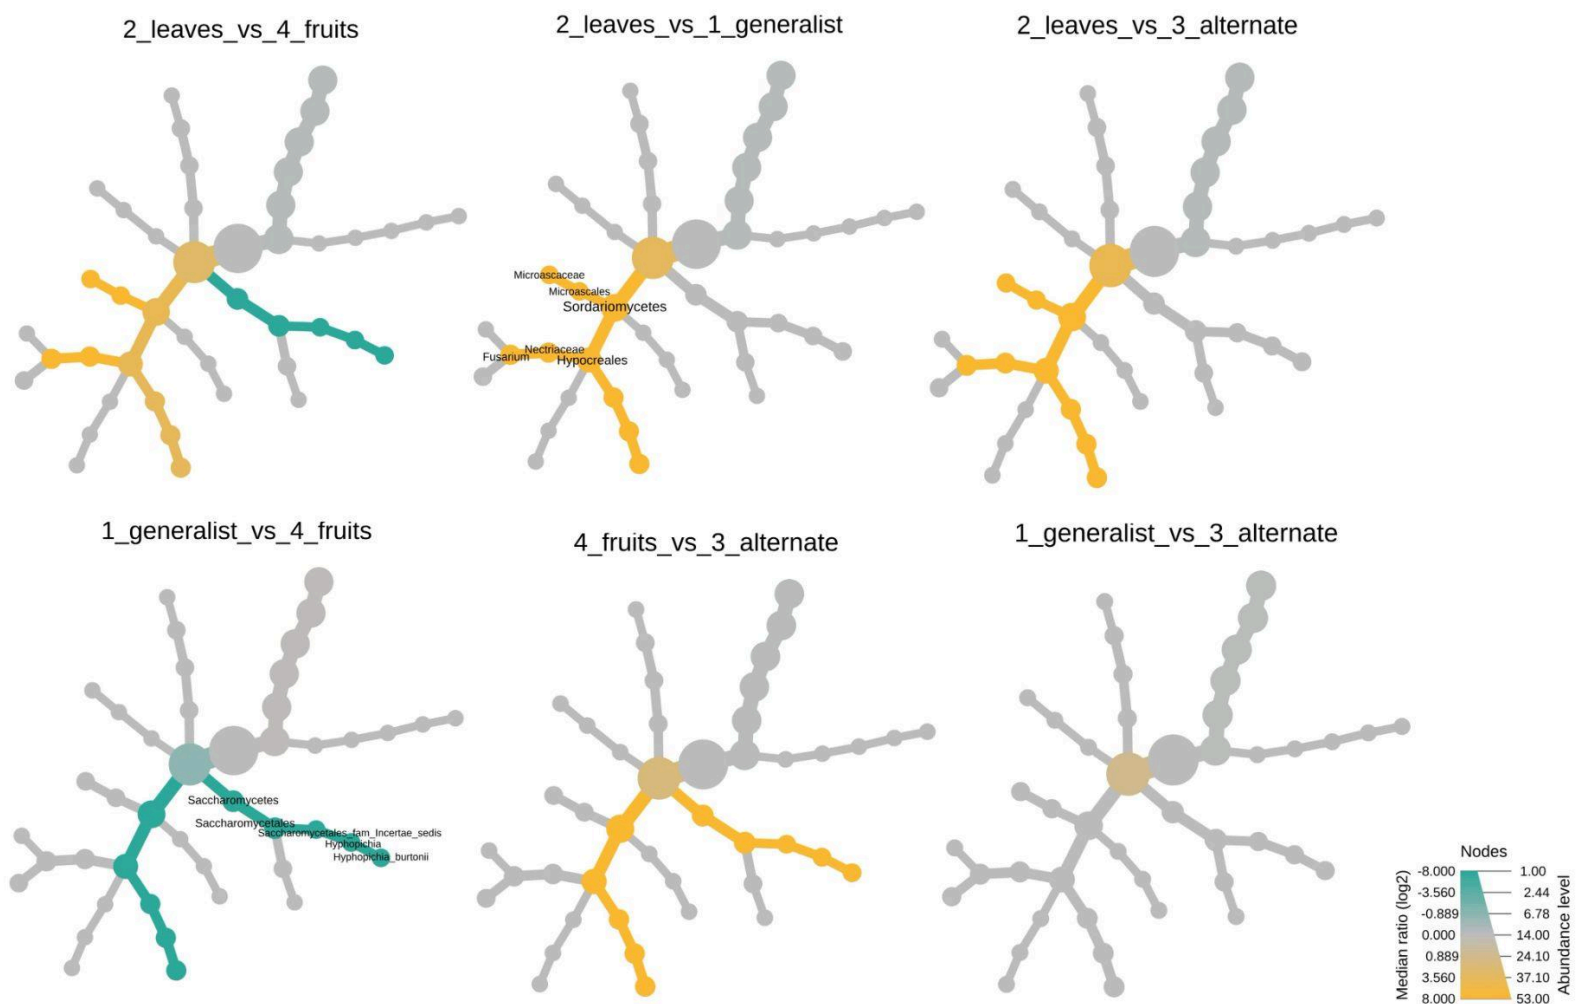

**Fig. S22:** Fungal genus-level heat tree, comparing the relative abundance between diets in central gardens.



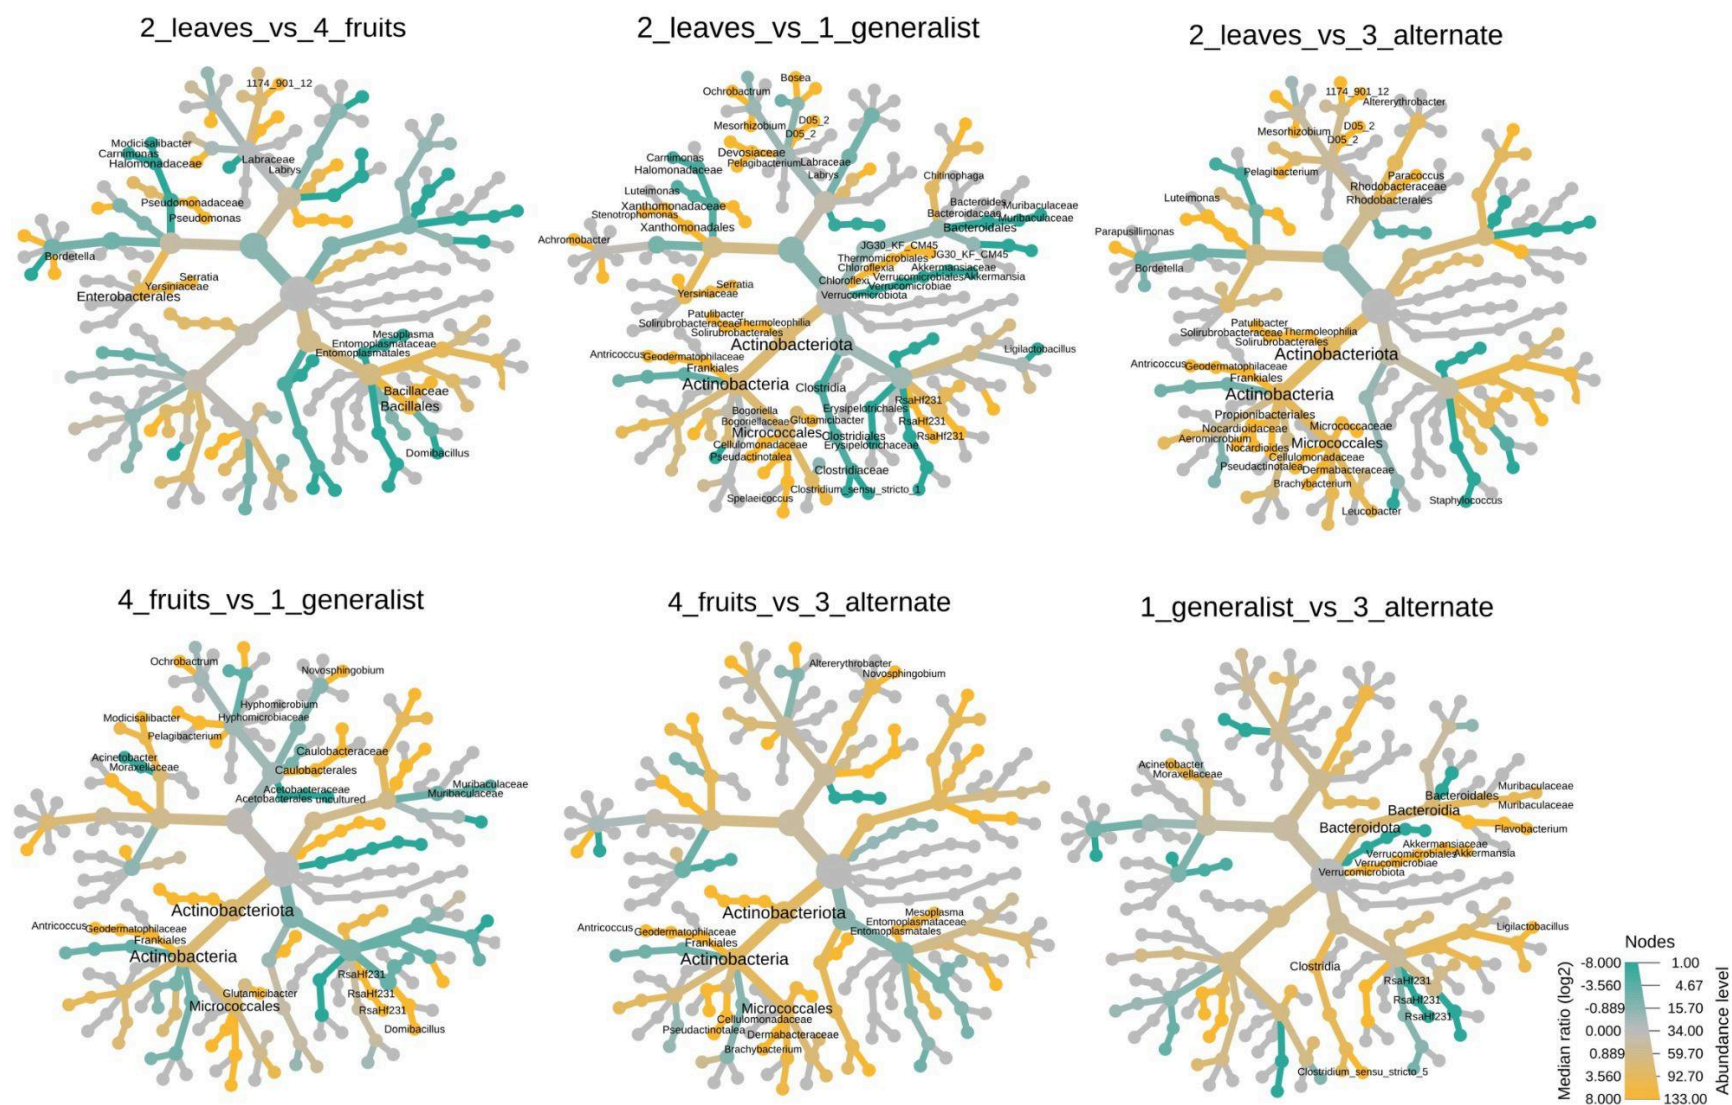

**Fig. S23:** Bacterial genus-level heat tree, comparing the relative abundance between diets in old gardens.





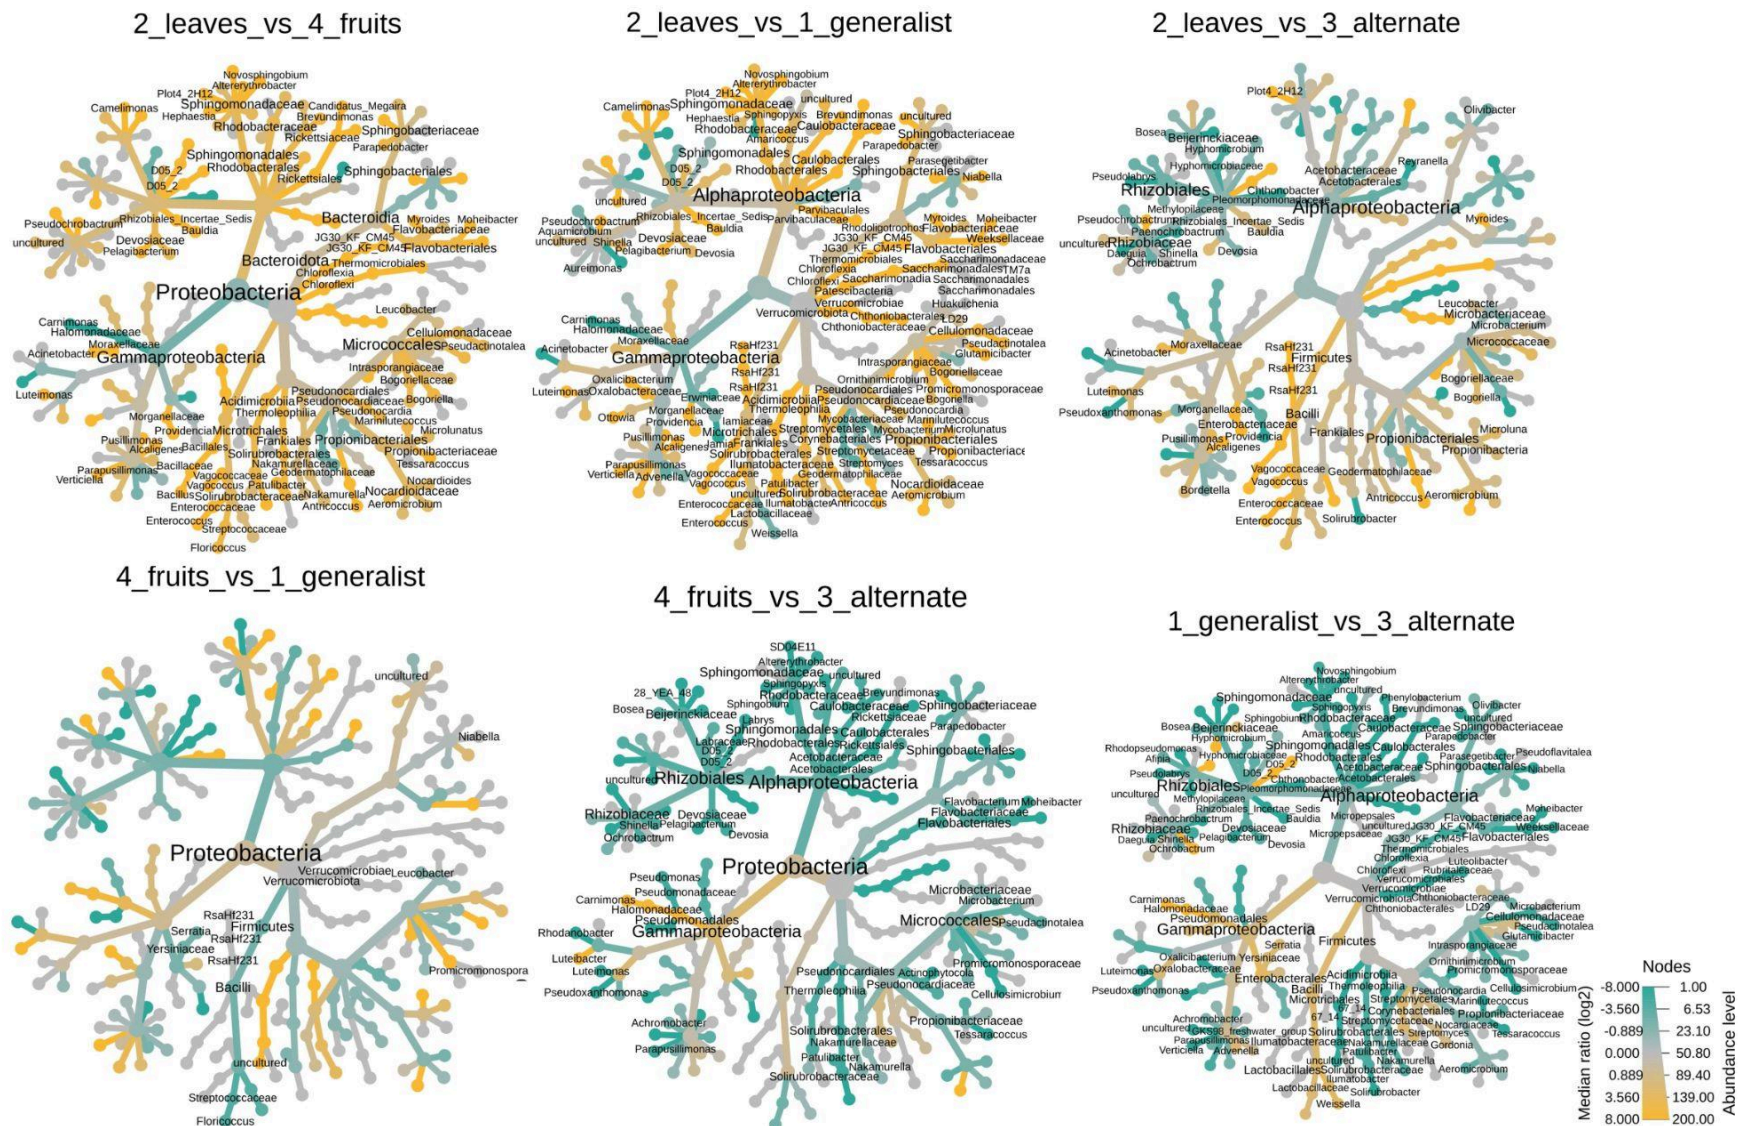

**Fig. S25:** Bacterial genus-level heat tree, comparing the relative abundance between diets in waste samples.



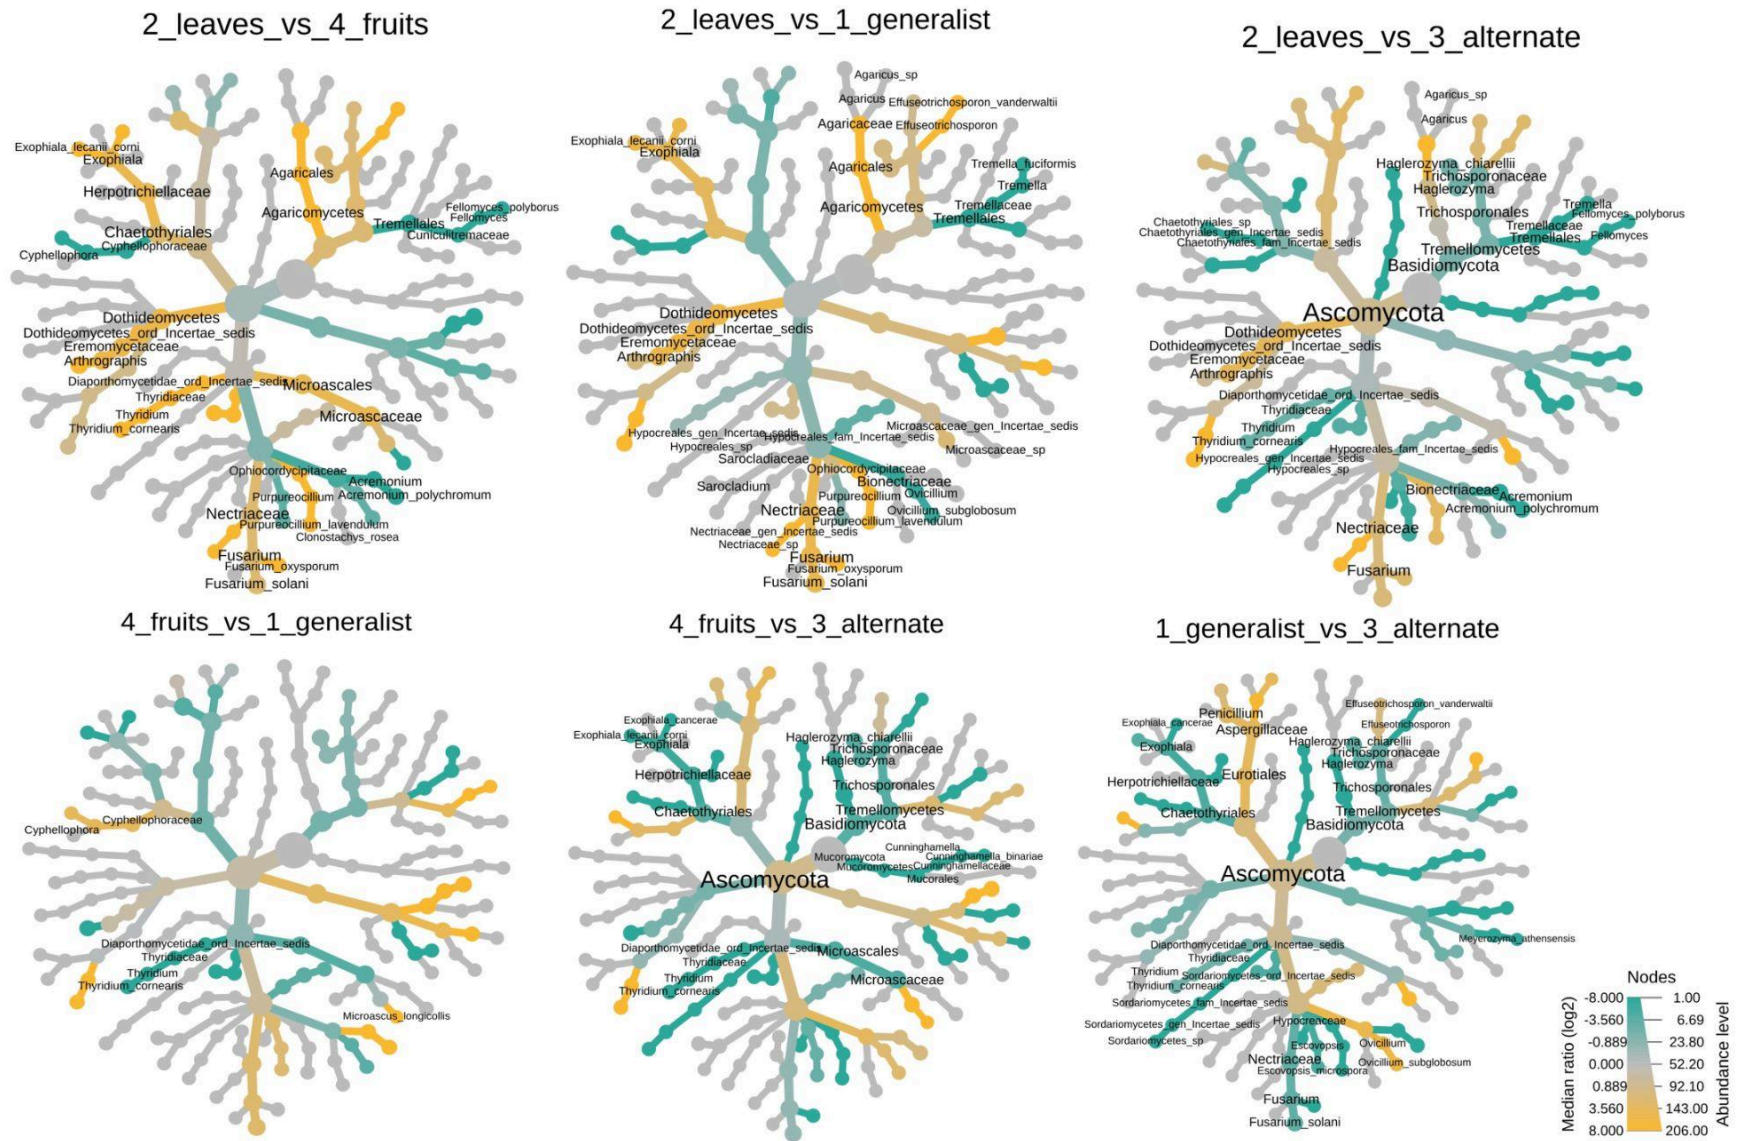

**Fig. S26:** Fungal genus-level heat tree, comparing the relative abundance between diets in waste samples.
